# Supplementary material for: Factors controlling pCO 2 variability in the eastern Gulf of Cádiz (SW Iberian Península)
Source: Copernicus journal article supplement (doi:10.5194/os-2019-6), 2019-02-15
Supplement: Supplementary file [file Revised_manuscript_version.pdf › Revised_manuscript_version.pdf]

# pCO<sub>2</sub> variability in the surface waters of the eastern Gulf of Cádiz (SW Iberian Peninsula)

Dolores Jiménez-López<sup>1</sup>, Ana Sierra<sup>1</sup>, Teodora Ortega<sup>1</sup>, Soledad Garrido<sup>2</sup>, Nerea Hernández-Puyuelo<sup>1</sup>,  
Ricardo Sánchez-Leal<sup>3</sup>, Jesús Forja<sup>1</sup>

5 <sup>1</sup> Dpto. Química-Física, INMAR, Facultad de Ciencias del Mar y Ambientales, Universidad de Cádiz, Campus Universitario  
Río San Pedro, 11510 - Puerto Real, Cádiz, Andalucía, España

<sup>2</sup> Instituto Español de Oceanografía. Centro Oceanográfico de Murcia. Varadero 1. E-30740, San Pedro del Pinatar, Murcia,  
España

10 <sup>3</sup> Instituto Español de Oceanografía. Centro Oceanográfico de Cádiz. Puerto Pesquero, Muelle de Levante s/n. Apdo. 2609. E-  
11006, Cádiz, España

*Correspondence to:* Dolores Jiménez-López (dolores.jimenez@uca.es)

## Abstract

Spatiotemporal variations of the partial pressure of CO<sub>2</sub> (pCO<sub>2</sub>) were studied during 8 oceanographic cruises conducted  
between March 2014 and February 2016 in surface waters of the eastern shelf of the Gulf of Cádiz (SW Iberian Peninsula)  
15 between the Guadalquivir River and Cape Trafalgar. pCO<sub>2</sub> presents a range of variation between 320.6 and 513.6 µatm, with  
highest values during summer and autumn and lowest during spring and winter. For the whole study, pCO<sub>2</sub> shows a linear  
dependence with temperature, and spatially there is a general decrease from coastal to offshore stations associated with  
continental inputs and an increase in the zones deeper than 400 m related to the influence of the eastward branch of the Azores  
Current. The study area acts as source of CO<sub>2</sub> to the atmosphere during summer and autumn and as a sink in spring and winter,  
20 with a mean value for the study period of  $-0.18 \pm 1.32 \text{ mmol m}^{-2} \text{ d}^{-1}$ . In the Guadalquivir and Sancti Petri transects, the CO<sub>2</sub>  
fluxes decrease towards offshore, whereas in the Trafalgar transect fluxes increase due to the presence of an upwelling. These  
results highlight the Gulf of Cádiz as a CO<sub>2</sub> sink, with an uptake capacity of 14.9 Gg C year<sup>-1</sup>.

## 1. Introduction

Continental shelves play a key role in the global carbon cycle, as this is where the interactions between terrestrial, marine and  
25 atmospheric systems take place (Mackenzie et al., 1991; Walsh, 1991; Smith and Hollibaugh, 1993). These zones are  
considered to be among the most dynamic in biogeochemical terms (Wollast, 1991; Bauer et al., 2013), as they are affected by  
several factors, particularly high rates of primary production, remineralization and organic carbon burial (Walsh, 1988;  
Wollast, 1993; de Hass et al., 2002). Continental shelves account for about 10 – 15 % of the ocean primary production and  
they contribute approximately 40 % of the ocean's total carbon sequestration, by biological pump (Muller-Karger et al., 2005).

30 Generally, waters over the continental shelf account for ~15 % of the global ocean CO<sub>2</sub> uptake ( $-2.6 \pm 0.5 \text{ Pg C yr}^{-1}$ , Le Quéré  
et al., 2017). Using direct surface ocean CO<sub>2</sub> measurements from the global Surface Ocean CO<sub>2</sub> Atlas (SOCAT) database,  
Laruelle et al. (2014) estimated a sea-air exchange of CO<sub>2</sub> in these zones of  $-0.19 \pm 0.05 \text{ Pg C yr}^{-1}$ , lower than the estimated in  
other studies published in the last decade (e.g. Borges et al., 2005; Cai et al., 2006; Chen and Borges, 2009; Laruelle et al.,  
2010; Chen et al., 2013). The discrepancies with respect to this estimation derive from the different definitions of the  
35 continental shelf domain and the skewed distribution of local studies (Laruelle et al., 2010). In several works, it has been  
observed that the continental shelves present different behaviour according to their latitude: they tend to act as a sink of carbon  
( $-0.33 \text{ Pg C yr}^{-1}$ ) at high and middle latitudes (30 - 90°) and as a weak source ( $0.11 \text{ Pg C yr}^{-1}$ ) at low latitudes (0 - 30°) (Cai et

al., 2006; Hofmann et al., 2011; Bauer et al., 2013; Chen et al., 2013; Laruelle et al., 2014, 2017). Laruelle et al. (2010) found differences between the two hemispheres: the continental shelf seas of the Northern Hemisphere are a net sink of CO<sub>2</sub> (-0.24 Pg C yr<sup>-1</sup>) and those of the Southern Hemisphere are a weak source of CO<sub>2</sub> (0.03 Pg C yr<sup>-1</sup>).

The behaviour of the continental shelf presents a high spatiotemporal variability of the air-sea CO<sub>2</sub> fluxes due to various processes, particularly thermodynamic effects, biological processes, gas exchange, upwelling zones and continental inputs (e.g. Chen and Borges, 2009; Ito et al., 2016). Thermodynamic effects are controlled by the inverse relationship between temperature and solubility (0.0423 °C<sup>-1</sup>, Takahashi et al., 1993). Biological processes can induce CO<sub>2</sub> uptake or release, deriving respectively from phytoplankton photosynthesis that decreases the concentration of inorganic carbon, and respiration by plankton and all other organisms, which increases the concentration of inorganic carbon (Fennel and Wilkin, 2009). Both factors, thermodynamic effects and biological processes, are associated with the sea-air CO<sub>2</sub> exchange by physical and biological pumps (Volk and Hoffert, 1985). The effects of upwelling systems are not clearly defined (Michaels et al., 2001). Although this process produces a vertical transport that brings up CO<sub>2</sub> and remineralized inorganic nutrients from deep seawater (Liu et al., 2010), upwellings are also responsible for high rates of primary production and a reduction of pCO<sub>2</sub> under the equilibrium with the atmosphere (e.g. van Geen et al., 2000; Borges and Frankignoulle, 2002; Friederich et al., 2002). Several studies indicate that these systems act as either a source or sink of CO<sub>2</sub> depending on their location (Cai et al., 2006; Chen et al., 2013). Upwelling systems at low latitudes act mainly as a source of CO<sub>2</sub> but as a sink of CO<sub>2</sub> at mid-latitudes (Frankignoulle and Borges, 2001; Feely et al., 2002; Astor et al., 2005; Borges et al., 2005; Friederich et al., 2008; González-Dávila et al., 2009; Santana-Casiano et al., 2009). Upwelling systems in the Pacific and Indian Oceans act as sources of CO<sub>2</sub> to the atmosphere, whereas in the Atlantic Ocean they are sinks of atmospheric CO<sub>2</sub> (Borges et al., 2006; Laruelle et al., 2010). Additionally, the inner shelf is more affected by riverine inputs of nutrients and terrestrial carbon (e.g. Gypens et al., 2011; Vandemark et al., 2011) and by human impact (Cohen et al., 1997). The influence of both factors, riverine inputs and human impact, decrease towards offshore (Walsh, 1991). Several studies have determined that the inner shelf tends to act as a source of CO<sub>2</sub> and the outer shelf as a sink (e.g. Rabouille et al., 2001; Cai, 2003; Jiang et al., 2008, 2013; Arruda et al., 2015). The inner platform (depth less than 40 m) also presents greater seasonal variability of temperature than the outer platform, and consequently the effect of temperature on pCO<sub>2</sub> will be greater in this zone (Chen et al., 2013).

The Gulf of Cádiz is a geographical domain of considerable interest due to its location. In addition to receiving the outflow of Mediterranean waters through the Strait of Gibraltar, it receives continental inputs from several major rivers, i.e. the Guadalquivir, Tinto, Odiel and Guadiana. Various studies have been conducted in this area to evaluate the variability of the sea surface partial pressure of CO<sub>2</sub> (pCO<sub>2</sub>), although they cover smaller areas and a shorter duration of time than this work (González-Dávila et al., 2003; Aït-Ameur and Goyet, 2006; Huertas et al., 2006; Ribas-Ribas et al., 2011) or only a specific area like the Strait of Gibraltar (Dafner et al., 2001; Santana-Casiano et al., 2002; de la Paz et al., 2009). All of these studies, however, have determined that this zone behaves as a global sink of CO<sub>2</sub>, with seasonal variations induced mainly by the combination of the fluctuations of biomass concentration and temperature.

In this paper we evaluate the spatial and seasonal variation of the sea-surface pCO<sub>2</sub> on the eastern shelf of the Gulf of Cádiz. In addition, we aim to assess the relative contribution of the thermal and non-thermal effects to pCO<sub>2</sub> distribution, and to determine if the area as a whole acts as a sink or a source of CO<sub>2</sub> to the atmosphere over time. It has also been possible to estimate the influence that various sea surface currents have on pCO<sub>2</sub> variability, since this study considers deeper areas than previous works. Therefore, we can analyse the change that has occurred in relation to the CO<sub>2</sub> uptake capacity in the Gulf of Cádiz in the last 10 years, in comparison with other studies that analyse the seasonal variation underway of pCO<sub>2</sub> in this area

(Ribas-Ribas et al., 2011). In this work we have analysed a surface measurement database of >26000 values of pCO<sub>2</sub> obtained during cruises made between 2014 and 2016 and covering an area of 0.8° x 1.3° of the Gulf of Cádiz.

## 2. Material and methods

### 80 2.1. Study area

This study was carried out over the eastern shelf of the Gulf of Cádiz (Fig. 1), which forms a large basin between the southwest of the Iberian Peninsula and the northwest of Africa, where the Atlantic Ocean connects with the Mediterranean Sea through the Strait of Gibraltar. In the Strait of Gibraltar a bilayer flow takes place, with an upper Atlantic layer flowing towards the Mediterranean basin and a deeper outflow of higher-density Mediterranean waters to the Atlantic Ocean (e.g. Armi and Farmer, 1988; Baringer and Price, 1999; Sánchez-Leal et al., 2017). A similar circulation pattern of opposing flows is found in the Gulf of Cádiz where three main water masses are distributed at well-defined depth intervals and areas: the Surface Atlantic Water (SAW), with coastal and atmospheric influence, inflowing at the shallowest depths; the Eastern North Atlantic Water (ENACW), at an intermediate depth, characterised by low salinity; and the Mediterranean Outflow Water (MOW), entering at the deepest level (Criado-Aldeanueva et al., 2006; Bellanco and Sánchez-Leal, 2016).

90 The Gulf of Cádiz is part of one of the four major Eastern Boundary Upwelling System of the world, the North Atlantic upwelling (e.g. Alvarez et al., 2009), that extends from south of Cape Verde (Senegal) to Cape Finisterre (northwest of Spain). For this reason, the Gulf of Cádiz presents characteristics typical of this system: seasonal variability of a winds system favourable to the coastal upwelling (Fiúza et al., 1982), high biological productivity (Navarro and Ruiz, 2006), a system of fronts and zonal currents (García Lafuente and Ruiz, 2007) and a zone of water exchange between the coastal zone and open 95 ocean (Sánchez et al., 2008). However, the fact that the coastline of the study area runs more in a W-E direction than the overall N-S direction common to all the Eastern Boundary Upwelling System phenomena, and the bilayer flow through the Strait of Gibraltar, are two factors that complicate the simple Eastern Boundary Upwelling System conceptual model (Aristegui et al., 2009; Peliz et al., 2009).

In addition, the surface circulation in the Gulf of Cádiz is characterised by several different processes. These are: the presence of an anticyclonic water flow towards the east over the shelf edge as far south as the Strait of Gibraltar, known as the Gulf of Cádiz Current (Sánchez and Relvas, 2003; Peliz et al., 2007); an upwelling process occurs in the Trafalgar area, produced by tidal interaction with the topography of the zone; and the mixing of surface layers induced by the wind (Vargas-Yáñez et al., 2002; Peliz et al., 2009; Sala et al., 2018). The centre of the Gulf is also under the influence of the eastern-end branch of the Azores Current, producing a front subjected to a mesoscale variability (Johnson and Stevens, 2000; García-Lafuente and Ruiz, 2007; Peliz et al., 2007; Sala et al., 2013) (Fig. 1).

### 2.2. Field sampling and analysis

The database for this study has been obtained following two different sampling strategies. The first consisted of taking sea surface measurements while underway. The second strategy was to obtain measurements at several discrete surface stations along three transects at right angles to the coastline: the Guadalquivir transect (GD), the Sancti Petri transect (SP) and the 110 Trafalgar transect (TF) (Fig. 1). Data was collected during 8 cruises carried out with a seasonal frequency (spring: ST1 and ST5; summer: ST2 and ST6; autumn: ST3 and ST7; winter: ST4 and ST8) during 2014, 2015 and 2016 (Table 1). All the cruises were made on the R/V Ángeles Alvariño, except the summer 2015 cruise (ST6) that was undertaken on the R/V Ramón Margalef. The study area is located between 35.4 and 36.7° N and 6.0 and 7.2° W (52.8·10<sup>2</sup> km<sup>2</sup>).

### 115 2.2.1. Underway measurements

Sea surface temperature (SST), sea surface salinity (SSS) and the pCO<sub>2</sub> were recorded continuously and were averaged with a frequency of 1 min intervals, from the surface seawater supply of the ship (pump inlet at a depth of 5m). SST and SSS were measured using a SeaBird thermosalinograph (SeaBird 21) with an accuracy of ±0.01 °C and ±0.003 respectively. The equilibrator design for determining the pCO<sub>2</sub> is a combination of a laminar flow system with a bubble type system, similar to that developed by Körtzinger et al. (1996) and described by Padin et al. (2009, 2010).

The surface water CO<sub>2</sub> molar fraction (xCO<sub>2</sub>) and H<sub>2</sub>O were determined using a non-dispersive infrared gas analyser (Licor®, LI 6262) that has a minimum accuracy of ±0.3 ppm. It was calibrated daily using two standards: a CO<sub>2</sub> free-air for the blank and a CO<sub>2</sub> sub-standard gas of known concentration (413.2 ppm). CO<sub>2</sub> concentration of the sub-standard gas was determined from the comparison with standard gases of NOAA with an uncertainty of 0.22 ppm and measured with a Licor 6262 (±1 ppm). The temperature inside the equilibrator was measured continuously by means of a platinum resistance thermometer (PT100 probe, ±0.1 °C). A pressure transducer (Setra Systems, accurate to 0.05 %) was used to measure the pressure inside the equilibrator. The xCO<sub>2</sub> was converted into pCO<sub>2</sub> according to the protocol described in DOE (2007). Corrections between the equilibrator and SST were made following Takahashi et al. (1993). The temperature difference between the ship's sea inlet and the equilibrator was less than 1.5 °C.

### 130 2.2.2. Fixed stations

Discrete surface samples were collected at 5 m depth, using Niskin bottles (10 L) mounted on a rosette-sampler coupled to a SeaBird CTD 911+, to measure pH and dissolved oxygen, chlorophyll-a and nutrients concentration.

The pH was measured by potentiometer in duplicate using 100 mL of seawater with a glass-combined electrode (Metrohm, 905) calibrated on the total pH scale using a TRIS buffer solution (Zeebe and Wolf-Gladrow, 2001). Dissolved oxygen values were obtained with the sensor of the rosette (SeaBird 63) pre-calibrated using Winkler titration (±0.1 µmol L<sup>-1</sup>) of samples collected from several water depths at selected stations (Parsons et al., 1984). Apparent Oxygen Utilization (AOU) was determined as the difference between the solubility calculated applying the expression proposed by Weiss (1974) and the experimental values of dissolved oxygen. For chlorophyll-a determination, 1 L of seawater was filtered (Whatman, GF/F 0.7 µm) and frozen (-20 °C) until analysis in the laboratory. Total chlorophyll-a was extracted with 90 % pure Acetone, and quantified after 24 hours by fluorometry analysis (Hitachi F-2500) (Yentsch and Menzel, 1963). Nutrient samples for analysis of nitrate and phosphate content were filtered through pre-combusted glass-fibre filters (Whatman, GF/F 0.7 µm) and frozen at -20 °C. Analyses were performed in a segmented flow autoanalyzer (Skalar, San Plus) based on classic spectrophotometric methods (Grasshoff et al., 1983). The accuracies of the determinations obtained are the following: ±0.003 for pH, ±0.1 µmol L<sup>-1</sup> for dissolved oxygen, ±0.1 µg L<sup>-1</sup> for chlorophyll-a, ±0.10 µmol L<sup>-1</sup> for nitrate, and ±0.02 µmol L<sup>-1</sup> for phosphate.

The corresponding data of SST, SSS and pCO<sub>2</sub> for the fixed stations were obtained by the underway measurements averaging data corresponding to 0.5 mile around the location of the fixed stations. SST and SSS data were compared with the values collected with the CTD coupled to the rosette-sampler and they do not show differences greater than 0.04 °C and 0.01 units, respectively.

### 2.3. Thermal and non-thermal effects on pCO<sub>2</sub> calculations

To determine the relative importance of the thermal and non-thermal effects on the changes of pCO<sub>2</sub> in seawater (e.g., Landschützer et al., 2015; Reimer et al., 2017), we follow the method proposed by Takahashi et al. (2002). To remove the

thermal effect from the observed pCO<sub>2</sub>, the data were normalized to a constant temperature, the mean in situ SST depending on the focus considered, according to Eq. (1).

$$pCO_2 \text{ at } SST_{\text{mean}} = (pCO_2)_{\text{obs}} \cdot \exp[0.0423 \cdot (SST_{\text{mean}} - SST_{\text{obs}})] \quad (1)$$

155 where the subscripts “mean” and “obs” indicate the average and observed SST values, respectively.

The effect of thermal changes on pCO<sub>2</sub> has been computed by perturbing the mean pCO<sub>2</sub> with the difference between the mean and observed temperature. The pCO<sub>2</sub> value at a given observed temperature (SST<sub>obs</sub>) was calculated based on Eq. (2).

$$pCO_2 \text{ at } SST_{\text{obs}} = (pCO_2)_{\text{mean}} \cdot \exp[0.0423 \cdot (SST_{\text{obs}} - SST_{\text{mean}})] \quad (2)$$

160 When the thermal effect is removed, the remaining variations in pCO<sub>2</sub> are due to the non-thermal influences, such as the biological utilization of CO<sub>2</sub>, the vertical and lateral transport, the sea-air exchange of CO<sub>2</sub> and terrestrial inputs (e.g. Qu et al., 2014; Arruda et al., 2015; Ito et al., 2016; Xue et al., 2016). The non-thermal effects on the surface water pCO<sub>2</sub>, (ΔpCO<sub>2</sub>)<sub>n-T</sub>, is represented by the seasonal amplitude of pCO<sub>2</sub> values normalized to the mean SST, (pCO<sub>2</sub> at SST<sub>mean</sub>), using Eq. (1):

$$(\Delta pCO_2)_{n-T} = (pCO_2, SST_{\text{mean}})_{\text{max}} - (pCO_2, SST_{\text{mean}})_{\text{min}} \quad (3)$$

165 The thermal effect of changes on the mean annual pCO<sub>2</sub> value, (ΔpCO<sub>2</sub>)<sub>T</sub>, is represented by the seasonal amplitude of pCO<sub>2</sub> values normalized to the observed SST, (pCO<sub>2</sub> at SST<sub>obs</sub>), using Eq.(2):

$$(\Delta pCO_2)_T = (pCO_2, SST_{\text{obs}})_{\text{max}} - (pCO_2, SST_{\text{obs}})_{\text{min}} \quad (4)$$

The relative importance of each effect can be expressed in terms of the ratio between the thermal effects (T) and non-thermal effects (B):

$$T/B = (\Delta pCO_2)_T / (\Delta pCO_2)_{n-T} \quad (5)$$

170 A T/B ratio greater than 1 implies the dominance of thermal effects over non-thermal on the pCO<sub>2</sub> dynamics. However, a T/B lower than 1 reveals a greater influence of non-thermal processes. This method was originally designed for open oceanic systems, but it has been widely used by other authors in coastal areas (e.g. Schiettecatte et al., 2007; Ribas-Ribas et al., 2011; Qu et al., 2014; Burgos et al., 2018).

175 In addition, Olsen et al. (2008) propose a method in which the seasonal signal of pCO<sub>2</sub> data is decomposed into individual components due to variations in SST, in air-sea CO<sub>2</sub> exchange, in SSS, and in combined mixing and biological processes.

$$d pCO_2^{\text{sw},i} = d_{\text{SST}} pCO_2^{\text{sw},i} + d_{\text{AS}} pCO_2^{\text{sw},i} + d_{\text{SSS}} pCO_2^{\text{sw},i} + d_{\text{MB}} pCO_2^{\text{sw},i} \quad (6)$$

180 where the superscript “i” refers to the mean value between consecutive cruises for all variables;  $d pCO_2^{\text{sw},i}$  is the observed change in pCO<sub>2</sub>;  $d_{\text{SST}} pCO_2^{\text{sw},i}$  is the change due to SST changes;  $d_{\text{AS}} pCO_2^{\text{sw},i}$  is the change due to air-sea exchange;  $d_{\text{SSS}} pCO_2^{\text{sw},i}$  is the change due to salinity variations; and  $d_{\text{MB}} pCO_2^{\text{sw},i}$  is the change due to mixing plus biology. At the same time, each process is calculated with the following equations (Olsen et al., 2008):

$$d_{\text{SST}} pCO_2^{\text{sw},i} = pCO_2^{\text{sw},i} \cdot e^{0.0423(\Delta \text{SST})} - pCO_2^{\text{sw},i} \quad (7)$$

where ΔSST is the SST difference between two cruises

$$d_{\text{AS}} pCO_2^{\text{sw},i} = - (d \cdot F^i) / \text{MLD}^i \quad (8)$$

185 where  $d$  is the number of days passed between two cruises (90 days approximately);  $F^i$  is the mean flux of  $\text{CO}_2$ ; and  $\text{MLD}^i$  is the mean mixed layer depth.

$d_{\text{SSS}}\text{pCO}_2^{\text{sw},i}$  is not determined in this study, since data on the variations of total alkalinity and dissolved inorganic carbon are not available, and the spatial SSS changes are only significant near the Guadalquivir River mouth.  $d_{\text{MB}}\text{pCO}_2^{\text{sw},i}$  is calculated as a residual, that is, as the change in  $\text{pCO}_2$  that is not explained by other processes. Additionally, as this study includes both coastal areas and deeper areas, the analysis is divided, in function of the system depth, between coastal ( $< 50$  m) and distal ( $> 50$  m) areas. Thus,  $\text{MLD}^i$  in distal areas (Table 3) was calculated derived from the thermocline position that separates the SAW and the ENACW (71.3 - 96.8 m), while the coastal areas correspond to the depth of these areas (15 - 50 m).

## 2.4. Estimation of $\text{CO}_2$ fluxes

Fluxes of  $\text{CO}_2$  across the sea-air interface were estimated using the relationship:

$$\text{FCO}_2 = \alpha \cdot k \cdot (\Delta\text{pCO}_2)_{\text{sea-air}} \quad (9)$$

195 where  $k$  ( $\text{cm h}^{-1}$ ) is the gas transfer velocity;  $\alpha$  is the solubility coefficient of  $\text{CO}_2$  (Weiss, 1974); and  $\Delta\text{pCO}_2$  is the difference between the sea and air values of  $\text{pCO}_2$ . The atmospheric  $\text{pCO}_2$  ( $\text{pCO}_2^{\text{atm}}$ ) values were obtained from the monthly atmospheric data of  $x\text{CO}_2$  ( $x\text{CO}_2^{\text{atm}}$ ) at the Izaña Atmospheric Station in Spain (Earth System Research Laboratory; <https://www.esrl.noaa.gov/gmd/dv/data/index.php>, last access: 9 January 2019). The  $x\text{CO}_2^{\text{atm}}$  was converted to  $\text{pCO}_2^{\text{atm}}$  as described in DOE (2007).

200 The gas transfer velocity,  $k$ , was calculated using the parameterization formulated by Wanninkhof (2014):

$$k = 0.251 \cdot u^2 (\text{Sc}/660)^{0.5} \quad (10)$$

where  $u$  ( $\text{m s}^{-1}$ ) is the mean wind speed at 10 m height on each cruise, obtained from the Shipboard Weather Station;  $\text{Sc}$  is the Schmidt number of  $\text{CO}_2$  in seawater; and 660 is the  $\text{Sc}$  in seawater at 20 °C.

## 2.5. Statistical analysis

205 Statistical analyses were performed with IBM SPSS Statistics software (Version 20.0. Armonk, NY). The dataset was analysed using one-way analysis of variance test (ANOVA) for analysing significant differences between cruises for discrete and continuous surface data on hydrological and biogeochemical characteristics. The threshold value for statistical significance was taken as  $p < 0.05$ . Moreover, all reported linear correlations are type I and they are statistically significant with  $p$ -values smaller than 0.05 in the entire manuscript unless indicated otherwise.

## 210 3. Results

### 3.1. Underway variables

Table 1 gives the ranges of variation and the mean and standard deviation of SST, SSS and  $\text{pCO}_2$  during the 8 sampling cruises and figure 2 shows the underway distribution of SST and  $\text{pCO}_2$  in the Gulf of Cádiz. Among all the cruises the SST values vary between 14.3 and 23.4 °C. The samplings made during 2014 presented SST values higher than those in 2015 and 2016 (Table 1). For the whole period, the averaged values for both seasons were highest during summer ( $21.0 \pm 0.8$  °C) and autumn ( $21.1 \pm 1.2$  °C), with the lowest values during spring ( $15.5 \pm 0.5$  °C) and an intermediate value during winter ( $17.5 \pm 0.6$  °C). In general, spatially SST tended to increase from coastal to offshore areas during spring and winter, while in summer and autumn this SST gradient was inverse (Fig. 2A). No substantial differences were found between the three transects studied

(GD, SP and TF), although near the Guadalquivir River mouth and Cape Trafalgar (36.19° N, 6.03° W) the lowest values of SST due to freshwater inputs and the frequent upwelled waters, respectively, were detected.

Since the cruises were carried out at the beginning of each meteorological season, it is appropriate to analyse how representative is the range of temperatures that has been obtained. Figure 3 shows the mean value over the last 10 years of the maximum and minimum temperatures in the Gulf of Cádiz acquired by a oceanographic buoy (bottom-mounted at 36.48° N - 6.96° W; Puertos del Estado; <http://www.puertos.es/es-es/oceanografia/Paginas/portus.aspx>, last access: 12 July 2018); the mean values and standard deviations of the 8 cruises are superimposed. It can be observed that the mean values for each cruise are within the range of variation of the typical temperature in the Gulf of Cádiz, and the mean temperature found, 18.8 °C, is very close to the mean value obtained at the oceanographic buoy (19.2 °C, Fig. 3).

Average values of SSS varied significantly among the cruises, ranging between 35.03 and 37.06. The highest values were recorded during February 2016 ( $36.44 \pm 0.09$ ) and lowest during September 2015 ( $35.64 \pm 0.08$ ) (Table 1). The lowest salinity value (35.03) and the most notable spatial variation (35.03 - 36.36) was observed during December 2014 in the area of the Guadalquivir River, associated with a period of storms with consequent major freshwater discharges. The area that presented the highest mean salinity value for the whole study was TF ( $36.19 \pm 0.25$ ).

During our study period, pCO<sub>2</sub> values ranged from 320.6 to 513.6 µatm. Highest values were recorded during summer and autumn of 2014 and 2015 (Table 1), with a similar mean value,  $411.6 \pm 13.2$  µatm and  $410.6 \pm 10.5$  µatm respectively, found for both seasons. The lowest mean value was logged during spring ( $382.5 \pm 16.9$  µatm), while winter presented an intermediate value ( $390.8 \pm 15.4$  µatm). In general, the pCO<sub>2</sub> tended to decrease with the distance to the coast (Fig. 2B). Comparing these values with pCO<sub>2</sub> values in the atmosphere, an undersaturation of CO<sub>2</sub> was observed during spring and winter ( $15.3 \pm 15.7$  and  $18.0 \pm 11.4$  µatm, respectively) and an oversaturation in summer and autumn ( $-20.4 \pm 24.6$  and  $-8.0 \pm 15.3$  µatm, respectively). In Fig. 2 a sharp variation of SST and pCO<sub>2</sub> can be observed in some zones that coincides with the stations where discrete water samples were taken. This may be due to the different sampling time at these stations, which varied between 2 and 8 hours in function of the depth of the system.

The database of this study includes the transition from coastal zones with depths of the order of 20 m to distal shelf waters with depths greater than 800 m. Figure 4 shows the general trend of the mean values of pCO<sub>2</sub> and SST for different intervals of depth of the water column based on the information obtained in the 8 cruises. There is no statistical difference in pCO<sub>2</sub> or SST with bottom depth. It can be observed that the highest values of pCO<sub>2</sub> ( $408.3 \pm 26.7$  µatm) correspond to the coastal zone (< 50 m), and that values decrease down to a depth of 100 - 200 m ( $396.1 \pm 23$  µatm). In addition, towards open waters (> 600 m) there is a progressive increase of pCO<sub>2</sub> and SST ( $404.3 \pm 16.5$  µatm and  $20.1 \pm 2.4$  °C, respectively).

### 3.2. Discrete surface variables

Table 2 shows the average values and standard deviation for the underway averaged measurements of SST and SSS, and for the discrete samples of pH, AOU, chlorophyll-a, nitrate and phosphate at fixed stations along the three transects during the 8 cruises. The pH presented significant differences among the cruises with a range of variation from 7.84 to 8.34. Lowest mean values were found during summer ( $8.00 \pm 0.04$ ) and autumn ( $7.96 \pm 0.05$ ) of 2014 and 2015 (Table 2), coinciding with the highest average values of pCO<sub>2</sub> recorded (Table 1). The pH values for spring and winter were equal practically for both years ( $8.08 \pm 0.08$  and  $8.07 \pm 0.05$ , respectively). AOU was significantly different between all the cruises, but a clear seasonal variability was not observed. Values measured ranged from -31.9 to 12.3 µmol L<sup>-1</sup>, with the highest values in December 2014 ( $7.7 \pm 2.1$  µmol L<sup>-1</sup>) and the lowest in March 2015 ( $-19.1 \pm 9.4$  µmol L<sup>-1</sup>) (Table 2). For both years, the lowest mean value was recorded in spring ( $-11.3 \pm 8.9$  µmol L<sup>-1</sup>), and the highest in winter ( $1.3 \pm 2.6$  µmol L<sup>-1</sup>). All mean values were negative except

for those of December 2014; that exception may have been due to the exceptional mixing of the water column caused by the storms. No general trend in the spatial variations of pH and AOU was found.

260 Chlorophyll-a values presented significant differences among the cruises and between the same seasons of each year. This parameter varied from 0.02 to 2.37  $\mu\text{g L}^{-1}$ , with the highest mean value measured in March 2015 ( $0.76 \pm 0.55 \mu\text{g L}^{-1}$ ), which coincides with the lowest (negative) mean value of AOU (Table 2). The lowest mean value was in June 2014 ( $0.18 \pm 0.14 \mu\text{g L}^{-1}$ ). With reference to the seasons of both years, the highest value was in spring ( $0.71 \pm 0.46 \mu\text{g L}^{-1}$ ), followed by winter ( $0.58 \pm 0.33 \mu\text{g L}^{-1}$ ), autumn ( $0.26 \pm 0.30 \mu\text{g L}^{-1}$ ) and the lowest value in summer ( $0.23 \pm 0.25 \mu\text{g L}^{-1}$ ). The SP transect presented  
265 the lowest mean value of the whole study ( $0.33 \pm 0.31 \mu\text{g L}^{-1}$ ), and the TF zone the highest ( $0.49 \pm 0.37 \mu\text{g L}^{-1}$ ).

Nitrate concentration did not show significant differences among the cruises, ranging between 0.00 and 1.93  $\mu\text{mol L}^{-1}$ . The highest mean value was recorded in spring ( $0.82 \pm 1.09 \mu\text{mol L}^{-1}$ ) and the lowest in summer ( $0.25 \pm 0.35 \mu\text{mol L}^{-1}$ ) of both years. The TF transect presented the highest mean concentration for the whole study ( $0.77 \pm 0.76 \mu\text{mol L}^{-1}$ ). Phosphate concentration showed significant differences among all the cruises. By season, the highest mean value was obtained during  
270 autumn ( $0.31 \pm 0.30 \mu\text{mol L}^{-1}$ ), although the average data in October 2014 ( $0.09 \pm 0.03 \mu\text{mol L}^{-1}$ ) was lower than that of 2015 ( $0.50 \pm 0.55 \mu\text{mol L}^{-1}$ ) (Table 2). The lowest mean value was observed during summer ( $0.10 \pm 0.05 \mu\text{mol L}^{-1}$ ). The GD transect presented the highest mean value of the whole study ( $0.28 \pm 0.39 \mu\text{mol L}^{-1}$ ), and the lowest values were found in the TF and SP transects, with a similar value in each,  $0.15 \pm 0.07 \mu\text{mol L}^{-1}$  and  $0.14 \pm 0.09 \mu\text{mol L}^{-1}$ , respectively. The mean N/P ratio in  
275 surface waters for the whole study was  $3.5 \pm 2.0$ , similar to that estimated by Anfuso et al. (2010) in the northeast continental shelf of the Gulf of Cádiz, which indicates a relative phosphate deficit with respect to the Redfield ratio (Redfield et al., 1963).

### 3.3. Air-sea CO<sub>2</sub> exchange

Table 3 summarizes the mean values and standard deviation for atmospheric pCO<sub>2</sub>, wind speed, gas transfer velocity and the air-sea CO<sub>2</sub> fluxes measured in this study. The mean wind speeds were relatively similar for the whole study period, ranging  
280 between  $5.5 \pm 2.8 \text{ m s}^{-1}$  (March 2015) and  $7.7 \pm 4.2 \text{ m s}^{-1}$  (December 2014). The gas transfer velocity varied between  $6.9 \pm 0.1 \text{ cm h}^{-1}$  in March 2015 and  $14.4 \pm 0.3 \text{ cm h}^{-1}$  in June 2015, since it is very sensitive to changes in wind speed. There was a clear seasonal variability in the dataset of CO<sub>2</sub> fluxes. The study area acted as source of CO<sub>2</sub> to the atmosphere during summer and autumn ( $0.7 \pm 1.5 \text{ mmol m}^{-2} \text{ d}^{-1}$  and  $1.2 \pm 0.9 \text{ mmol m}^{-2} \text{ d}^{-1}$ , respectively) and as a sink in spring and winter ( $-1.3 \pm 1.6 \text{ mmol m}^{-2} \text{ d}^{-1}$  and  $-1.3 \pm 1.6 \text{ mmol m}^{-2} \text{ d}^{-1}$ , respectively).

## 4. Discussion

### 285 4.1. Thermal influence in pCO<sub>2</sub>

Numerous research studies have determined that temperature is one of the most important factors that control the variability of pCO<sub>2</sub> in the ocean (e.g. Millero, 1995; Bates et al., 2000; Takahashi et al., 2002; Carvalho et al., 2017), as a consequence of the dependence of the solubility of CO<sub>2</sub> with the temperature (Weiss, 1974; Woolf et al., 2016). When pCO<sub>2</sub> is affected only by the temperature, Takahashi et al. (1993) determined a relative variation of pCO<sub>2</sub> of  $0.0423 \text{ }^\circ\text{C}^{-1}$ , equivalent to  $16.9 \mu\text{atm }^\circ\text{C}^{-1}$   
290 for experimental pCO<sub>2</sub> of 400  $\mu\text{atm}$ . In our study a seasonal variation was observed with a linear increase of the values of pCO<sub>2</sub> with SST for the entire database ( $r^2 = 0.37$ , Fig. 5A). This relationship becomes more significant when it is obtained from the mean values of pCO<sub>2</sub> and SST of each cruise ( $r^2 = 0.71$ , Fig. 5B). The slope,  $4.80 \mu\text{atm }^\circ\text{C}^{-1}$ , is lower than the thermal effect on pCO<sub>2</sub> described by Takahashi et al. (1993), and indicates the influence of other non-thermal processes on the distribution of pCO<sub>2</sub> in this zone of the Gulf of Cádiz.



295 There are previous studies in which the seasonal variations of pCO<sub>2</sub> in more coastal zones of the Gulf of Cádiz (depth < 100 m) are described (Table 4). Ribas-Ribas et al. (2011) found in the north eastern shelf during June 2006 and May 2007 a dependence of pCO<sub>2</sub> with temperature similar to that found in this study ( $5.03 \mu\text{atm } ^\circ\text{C}^{-1}$ ,  $r^2 = 0.42$ ), and a pCO<sub>2</sub> that ranged between 338 and 502  $\mu\text{atm}$ . In 2003, Huertas et al. (2006) found variations of pCO<sub>2</sub> ranging between 196  $\mu\text{atm}$  in March and 400 - 650  $\mu\text{atm}$  in August in a zone situated more to the west, between the rivers Guadalquivir and Guadiana. In addition, de la Paz et al. (2009) established a variation of pCO<sub>2</sub> between 387  $\mu\text{atm}$  in September 2005 and 329  $\mu\text{atm}$  in March 2006 in the Strait of Gibraltar, a deeper zone situated at the south eastern limit of the Gulf of Cádiz. This dependence of pCO<sub>2</sub> with temperature has also been determined in other studies of continental shelves, such as in the east China Sea (Wang et al., 2000), in the northern east China Sea (Shim et al., 2007) and in the northern Yellow Sea (Xue et al., 2012).

Comparing the data given in previous studies of the Gulf of Cádiz with the mean value found in this study ( $398.9 \pm 15.5 \mu\text{atm}$ ), it is evident that there has been an increase of pCO<sub>2</sub> during the last decade, even taking into account the uncertainty associated with the different measurement techniques employed. When we compare this mean value with the value found in the shallower and deeper zones of the Gulf of Cádiz studied by Ribas-Ribas et al. (2011) ( $360.6 \pm 18.2 \mu\text{atm}$ ), who used the same methodology, there has been an increase of pCO<sub>2</sub> of  $38.3 \pm 16.9 \mu\text{atm}$  in the last decade. For the period of time between 2006 and 2016, the rate of growth of pCO<sub>2</sub> in the surface waters of the Gulf of Cádiz ( $3.8 \pm 1.7 \mu\text{atm year}^{-1}$ ) exceeds the rate of increase of pCO<sub>2</sub> in the atmosphere ( $2.3 \mu\text{atm year}^{-1}$  for the last 10 years in Izaña (Earth System Research Laboratory; <https://www.esrl.noaa.gov/gmd/dv/data/index.php>, last access: 9 January 2019)). This suggests a possible increase of the anthropogenic nutrient and C inputs from land (Mackenzie et al., 2004) since the direction and magnitude of estuarine and continental shelf CO<sub>2</sub> exchange with the atmosphere is highly dependent on the terrestrial organic budget and nutrient supplies to the coastal ocean (Borges and Abril, 2011; Cai, 2011).

#### 315 **4.2. Non-thermal factors controlling pCO<sub>2</sub>**

Several authors have described the influence of the continental inputs on the distribution of pCO<sub>2</sub> in surface waters. In general, the coastal zone is usually oversaturated with CO<sub>2</sub> (Fig. 4), whereas the continental shelf as a whole acts as a sink of atmospheric CO<sub>2</sub> (e.g. Rabouille et al., 2001; Chen and Borges, 2009). This behaviour has been described in other systems, including the southern part of the Yellow Sea (Qu et al., 2014), the southwestern part of the Atlantic Ocean (Arruda et al., 2015), the North Sea (Clargo et al., 2015), and on the continental shelf of Maranhense (Lefèvre et al., 2017).

The principal continental inputs in the northeast zone of the Gulf of Cádiz take place from the estuary of the Guadalquivir and from the systems associated with the Bay of Cádiz. De la Paz et al. (2007) found values of pCO<sub>2</sub> higher than 3000  $\mu\text{atm}$  in the internal part of the estuary of the Guadalquivir, and Ribas-Ribas et al. (2013) established that this estuary acts as an exporter system of C, nutrients and water oversaturated with CO<sub>2</sub> to the adjoining coastal zone. The importance of the contributions from the Guadalquivir on the distribution of pCO<sub>2</sub> depends on the river's flow rate, as can be appreciated in Fig. 2B. The highest values of pCO<sub>2</sub> (up to 500  $\mu\text{atm}$ ) were observed during March 2014 in the zone close to the Guadalquivir River mouth, as a consequence of the river's high flow rate (between 192.7 and 299.2  $\text{m}^3 \text{s}^{-1}$ , Confederación Hidrográfica del Guadalquivir; <http://www.chguadalquivir.es/saih/DatosHistoricos.aspx>, last access: 19 July 2018). In contrast, the lowest values of pCO<sub>2</sub> were recorded in spring of 2015 in this zone (as low as 320  $\mu\text{atm}$ ) in a period of drought (flow rate 20  $\text{m}^3 \text{s}^{-1}$ ) and subject to intense biological activity associated with the highest value found of the concentration of chlorophyll-a (2.4  $\mu\text{g L}^{-1}$ ). The Bay of Cádiz occupies an area of 38  $\text{km}^2$ , and receives urban effluents from a population of 640,000 inhabitants. This shallow zone is oversaturated with CO<sub>2</sub> (Ribas-Ribas et al., 2011) due largely to the inputs of inorganic carbon, organic matter and nutrients that are received from the Guadalete River and Sancti Petri Channel and the Río San Pedro tidal creeks (de la Paz et al., 2008a, b; Burgos et al, 2018).

335 Another source of CO<sub>2</sub> in the coastal zone results from the net production of inorganic carbon derived from the processes of  
remineralization of the organic matter in the surface sediments originating from the continuous deposition of organic matter  
through the water column (de Haas et al., 2002; Jahnke et al., 2005). The intensity of this process decreases in line with the  
increasing depth of the system, and the influence of the primary production and the continental supplies on the deposition of  
the particulate organic matter is less (Friedl et al., 1998; Burdige, 2007; Al Azhar et al., 2017). Ferrón et al. (2009) quantified  
340 the release from the sediment of DIC related to the processes of oxidation of organic matter in the coastal zone (depth < 50 m)  
of the Gulf of Cádiz, between the Guadalquivir and the Bay of Cádiz. These authors found a mean benthic flux of  $27 \pm 8$  mmol  
C m<sup>-2</sup> d<sup>-1</sup> for stations with a mean depth of 23 m. This flux of DIC is equivalent to a CO<sub>2</sub> flux of  $198 \pm 80$  μmol C m<sup>-2</sup> d<sup>-1</sup>,  
considering a well-mixed water column, a pH = 8, in the conditions of mean temperature and salinity in the Gulf of Cádiz  
(18.8 °C and 36.19, respectively) and using the K1 and K2 acidity constants proposed by Lueker et al. (2000) in the total pH  
345 scale. Moreover, this estimated CO<sub>2</sub> benthic flux would produce an increase of pCO<sub>2</sub> of  $0.25 \pm 0.10$  μatm d<sup>-1</sup> in the water  
column.

Additionally, another factor present in the Gulf of Cádiz and that could affect the distribution of pCO<sub>2</sub> is the vertical and lateral  
transport. For example, there are two upwelling systems in our study zone, one more permanent situated in the coastal zone  
(depth between 50 and 100 m) of the Trafalgar section (Prieto et al., 1999; Vargas-Yáñez et al., 2002) and the other located  
350 between the Cape of Santa María and the Guadalquivir River and more sensitive to meteorological forcing (Criado-Aldeanueva  
et al., 2006). In our database, experimental evidence of the upwelling was found only in the TF transect. In our database  
experimental evidence of the upwelling was found only in the TF transect. A local decrease of the mean values of SST (17.4  
°C) and pCO<sub>2</sub> (399.1 μatm) was observed in this coastal area of TF, with respect to the deeper areas (18.8 °C and 405.1 μatm,  
respectively) for the whole period. This input of colder waters could cause higher or lower concentrations of CO<sub>2</sub> (e.g. Liu et  
355 al., 2010; Xue et al., 2015; González-Dávila et al., 2017). There is a progressive increase of SST and pCO<sub>2</sub> with increasing  
depth of the system measured below 100 - 200 m (Fig. 4); this is associated with the presence of a branch of the Azores Current  
that introduces warmer waters in the central part of the Gulf of Cádiz (Gould, 1985; Käse et al., 1985; Johnson and Stevens,  
2000). The influence of warmer surface currents on the variability of pCO<sub>2</sub> has been observed in other studies, such as the  
Gulf Stream in the south-eastern continental shelf of the United States (Wang et al., 2005; Jiang et al., 2008), and the Kuroshio  
360 Current in the northern East China Sea (Shim et al., 2007).

With the object of investigating the influence of the biological utilization of CO<sub>2</sub> on the variations of pCO<sub>2</sub>, Fig. 6 shows the  
dependence between the mean values of pCO<sub>2</sub> and pH, AOU and the concentration of chlorophyll-a at the fixed stations (n =  
126). AOU presents a positive relationship ( $pCO_2$  (μatm) = 410 + 1.1 AOU (μmol L<sup>-1</sup>),  $r^2 = 0.21$ ), with a slope close to what  
would be obtained taking into account the processes of formation/oxidation of the organic matter phytoplankton considering  
365 a Redfield-type relationship. Inverse relationships between pCO<sub>2</sub> and dissolved oxygen were also found in other studies of  
continental shelf (Zhai et al., 2009; de la Paz et al., 2010; Xue et al., 2012, 2016). However, pCO<sub>2</sub> and pH presents an inverse  
relationship ( $pCO_2$  (μatm) = 1710 - 162.8 pH,  $r^2 = 0.34$ ), due to the effect of the uptake or production of CO<sub>2</sub> on the pH  
(Tsunogai et al., 1997; Shaw et al., 2014). The variation of pCO<sub>2</sub> with chlorophyll-a ( $pCO_2$  (μatm) = 413 - 20.8 [chlorophyll-  
a] (μg L<sup>-1</sup>),  $r^2 = 0.14$ ) also show the influence of the processes of photosynthesis and respiration (e.g. Cai et al., 2011; Clargo  
370 et al., 2015), with a slope value similar to that obtained in the study of Huertas et al. (2005), ( $pCO_2$  (μatm) = 274 - 19.6  
[chlorophyll-a] (μg L<sup>-1</sup>),  $r^2 = 0.32$ ; n = 28). Other authors have also described the interrelationships existing between pCO<sub>2</sub> and  
chlorophyll-a in other coastal areas (Borges and Frankignoulle, 1999; Tseng et al., 2011; Zhang et al., 2012; Qin et al., 2014;  
Litt et al., 2018).

In accordance with Olsen et al. (2008), Fig. 10 shows the decomposition of the variations of pCO<sub>2</sub> between cruises due to changes in SST, in air-sea CO<sub>2</sub> exchange and in combined mixing and biology, in distal and coastal areas. In general, the variations are greater than those found in other works (Olsen et al., 2008; Omar et al., 2010) because this study considers seasonal changes against the monthly change analysed in previous applications.  $dpCO_2^{sw}$  presents practically the same temporal trend in deep and coastal areas, but with a global behaviour different since the distal zones act a sink of CO<sub>2</sub> of the system (mean  $dpCO_2^{sw} = -3.4 \pm 28.9 \mu\text{atm}$ ) and the shallower areas as a source of CO<sub>2</sub> (mean  $dpCO_2^{sw} = 0.2 \pm 22.7 \mu\text{atm}$ ). In distal areas (Fig. 10), pCO<sub>2</sub> changes are mainly brought about by SST (-58.4 - 106.2  $\mu\text{atm}$ ) together with mixing and biology processes (-90.8 - 36.2  $\mu\text{atm}$ ). An inverse coupling is observed between  $d_{SST}pCO_2^{sw}$  and  $d_{MB}pCO_2^{sw}$ , since with the increase of the system SST (increase  $d_{SST}pCO_2^{sw}$ ) there is greater biological uptake of CO<sub>2</sub> (decrease  $d_{MB}pCO_2^{sw}$ ). As reported in the studies of Olsen et al. (2008) and Omar et al. (2010), the change produced by the air-sea CO<sub>2</sub> exchange is lower. Instead, in coastal areas (Fig. 10), the dominant effects on pCO<sub>2</sub> changes are produced by air-sea CO<sub>2</sub> exchange (-196.2 - 103.4  $\mu\text{atm}$ ) and mixing plus biology (-101.1 - 198.5  $\mu\text{atm}$ ). A relative inverse coupling between the two factors was also observed; outgassing is produced (decrease  $d_{AS}pCO_2^{sw}$ ) when the system receives greater inputs/production of CO<sub>2</sub> (increase  $d_{MB}pCO_2^{sw}$ ). There is a different behaviour between the transition from spring to summer of 2014 (ST1 and ST2) and 2015 (ST5 and ST6) for  $d_{MB}pCO_2^{sw}$ , which may be due to a greater quantity of continental inputs, as reflected in the Guadalquivir river flow rate in these periods ( $85.1 \pm 75.4 \text{ m}^3 \text{ s}^{-1}$  and  $25.3 \pm 10.2 \text{ m}^3 \text{ s}^{-1}$ , respectively). A larger effect of the air-sea CO<sub>2</sub> exchange on pCO<sub>2</sub> variation is observed in the shallower mixed layers, as also described by Olsen et al. (2008) in the subpolar North Atlantic.

#### 4.3. T/B ratio

In this study, the total T/B ratio is 1.15, which indicates that the thermal effect is an important factor controlling intra-annual variation of pCO<sub>2</sub>. This value is similar to that determined by Ribas-Ribas et al. (2011) (see date and study zone in Table 4), in the northeast zone of the shelf of the Gulf of Cádiz, with a ratio of 1.3. De la Paz et al. (2009) (see date and study zone in Table 4) propose a T/B ratio of 2.4 in the Strait of Gibraltar, indicating very significant thermal control in this relatively deep zone situated to the east of the Gulf of Cádiz.

Figure 8 presents the values of the T/B ratio grouped in different bottom-depth intervals of the water column in the system. The variations of  $\Delta pCO_2$  non-thermal and  $\Delta pCO_2$  thermal found have been superimposed. In the coastal zone (depth < 50 m), the T/B ratio is below 1 (0.9), and increases to values of 1.3 in the central zone of the Gulf of Cádiz, at depths ranging from 100 to 400 m. However, in the deepest zone (depth > 600 m), a progressive decrease to values of 1.1 is found. Qu et al. (2014) also reported the variation in the values of the T/B ratio with the distance from the coast in the southern Yellow Sea, between 0.4 - 0.6 in the nearshore area (depth < 50 m) to more than 1 (up to 2.4) in the offshore area (depth > 50 m).

This variation of the T/B ratio is largely caused by the variations of  $\Delta pCO_2$  non-thermal. High values close to the coast were observed (120.2  $\mu\text{atm}$ ), affected by continental inputs, processes of remineralization in the sediment and biological utilization of CO<sub>2</sub>. The increase of the T/B ratio and the decrease of  $\Delta pCO_2$  non-thermal (75  $\mu\text{atm}$ ) from the coastal zone to the central part of the Gulf of Cádiz are associated with the variations of the chlorophyll-a and nutrient concentrations that diminish exponentially with the depth of the system. Thus, the mean concentrations of chlorophyll-a, nitrate and phosphate in the distal zone are 66.3, 81.9 and 44.8 % less, respectively, than the concentrations found close to the coast. However, the concentrations of chlorophyll-a and nutrients are relatively constant in waters with bottom-depth greater than 200 m, and do not explain the decrease of the T/B ratio and the increase of  $\Delta pCO_2$  non-thermal (90.7  $\mu\text{atm}$ ) in waters with bottom-depth greater than 400 m. These variations have been associated with the change in the origin of the surface water masses. Thus, in the central zone of the Gulf of Cádiz, the origin of the surface waters is a branch of the larger-scale Portuguese-Canaries eastern boundary current

415 that circulates around a cyclonic eddy off Cape St. Vincent and veers eastward into the Gulf of Cádiz (García-Lafuente et al., 2006). However the deepest zone is under the influence of a branch of the Azores current, which is a warmer stream that could lead to an increase in primary production; in addition it is the northern border of the subtropical gyre (Klein and Siedler, 1989); these two factors favour the accumulation of CO<sub>2</sub> in this area as a convergence zone (Ríos et al., 2005). The observed variations of ΔpCO<sub>2</sub> non-thermal between areas close to the coast and deeper areas agrees with the application of the Olsen et al. (2008) method.

420 The T/B ratios have also been calculated for the different transects at right angles to the coast that have been cruised for sampling in the study zone, as shown in Fig. 9. It can be appreciated that the T/B ratio increases with the distance from the coast on the three transects, and that the temperature generally has a greater influence on the distribution of pCO<sub>2</sub> than the non-thermal effects. The T/B ratio varies to the east, with values between 1.0 in the zone of the GD and 1.4 in SP, and an intermediate value of 1.2 in the TF zone. These variations are related to changes in the biological activity and the presence of coastal upwellings. The Guadalquivir zone receives substantial continental supplies that lead to high relative concentrations of chlorophyll-a and nutrients; these give rise to high values of ΔpCO<sub>2</sub> non-thermal. In particular, coastal waters near the mouth of the Guadalquivir River present the highest primary production of all waters within the Gulf of Cádiz (Navarro and Ruiz, 2006). The coastal zone close to Cape Trafalgar has been characterized as a region with high autotrophic productivity and biomass associated mainly with the nutrients input due to upwelling waters (e.g. Echevarría et al., 2002; García et al., 2002). 425  
430 The presence of these emerging water masses could be related to the relatively low values of ΔpCO<sub>2</sub> thermal found in this zone; in fact, the mean temperature in this area is 18.4 ± 2.3 °C, about 0.5 °C lower than in the other two zones. The Sancti Petri zone is the one that receives a smaller supply of nutrients, and presents the lowest concentrations of chlorophyll-a in this study. The high values of ΔpCO<sub>2</sub> thermal in this part of the Gulf of Cádiz are associated with a higher mean temperature (19.0 °C) and a wider range of variation (6.8 °C).

#### 435 **4.4. Ocean-atmosphere CO<sub>2</sub> exchange**

In the Gulf of Cádiz, the flux of CO<sub>2</sub> presents a range of variation from -5.6 to 14.2 mmol m<sup>-2</sup> d<sup>-1</sup>. These values are within the ranges observed by other authors in different areas of the Gulf of Cádiz (Table 4). As can be appreciated in Fig. 10, the fluxes of CO<sub>2</sub> presented seasonal and spatial variations during the period studied. The Gulf of Cádiz acts as a source of CO<sub>2</sub> to the atmosphere during the months of summer (ST2, ST6) and autumn (ST3, ST7), and as a sink in spring (ST1, ST5) and winter (ST4, ST8). Previous studies conducted in the Gulf of Cádiz are consistent with the behaviour found in this study (González-Dávila et al., 2003; Ait-Ameur and Goyet, 2006; Ribas-Ribas et al., 2011). 440

As has been observed with pCO<sub>2</sub>, temperature is one of the principal factors that control the fluxes of CO<sub>2</sub>. In fact, for each cruise, a linear and positive relationship has been found between the mean values of the CO<sub>2</sub> fluxes and SST ( $r^2 = 0.72$ , Fig. 11). In parallel, there is a linear and negative relationship between the mean values of the CO<sub>2</sub> fluxes and the concentration of chlorophyll-a at the discrete stations sampled ( $r^2 = 0.74$ , Fig. 11), as a consequence of the biological utilization of the CO<sub>2</sub> (Qin et al., 2014). These relationships have also been found in various studies carried out in zones similar to the area studied (Zhang et al., 2010; Arnone et al., 2017; Carvalho et al., 2017). 445

The fluxes of CO<sub>2</sub> in the Gulf of Cádiz tend to decrease with the distance from the coast (Fig. 10). The coastal zone (< 50 m) presents a mean CO<sub>2</sub> flux of 0.8 ± 1.8 mmol m<sup>-2</sup> d<sup>-1</sup>, that reduces progressively to reach a value of -0.3 ± 1.6 mmol m<sup>-2</sup> d<sup>-1</sup> in open waters with bottom-depth greater than 600 m. This dependence of CO<sub>2</sub> fluxes with distance from the coast has also been reported in other systems, such as in the South Atlantic Bight of the United States (Jiang et al., 2008), in the south-western part of the Atlantic Ocean (Arruda et al., 2015), in the Patagonian Sea (Kahl et al., 2017) and on the continental shelf of 450

Maranhense (Lefèvre et al., 2017). This dependence is the consequence of the decrease of influence of the continental supplies on the CO<sub>2</sub> fluxes as one moves towards the open sea. Ribas-Ribas et al. (2011) also found that in the Gulf of Cádiz the CO<sub>2</sub> fluxes vary with the distance from the coast; the zone close to the estuary of the Guadalquivir and the Bay of Cádiz acts as a source (1.39 mmol m<sup>-2</sup> d<sup>-1</sup>) and the zone comprising the rest of the shelf acts as a sink (-0.44 mmol m<sup>-2</sup> d<sup>-1</sup>).

In addition, on both the GD and SP transects a decrease of the CO<sub>2</sub> flux is found towards the open ocean, due to the continental inputs associated with the estuary of the Guadalquivir and with the Bay of Cádiz, respectively. On the TF transect, in contrast, it was observed that the zone close to the coast acts as a sink of CO<sub>2</sub> (-0.4 ± 1.2 mmol m<sup>-2</sup> d<sup>-1</sup>), and the deeper zone is a weak source of CO<sub>2</sub> to the atmosphere (0.3 ± 1.3 mmol m<sup>-2</sup> d<sup>-1</sup>). This finding can be explained by the presence of an upwelling close to the coast that is likely to be causing an increase of the production (e.g. Hales et al., 2005; Borges et al., 2005). With reference to this, on the TF transect there are significant differences between the mean surface concentrations of chlorophyll-a and nitrate in the coastal zone (0.63 ± 0.43 µg L<sup>-1</sup> and 1.09 ± 0.77 µmol L<sup>-1</sup>, respectively) and in deeper zones (0.17 ± 0.12 µg L<sup>-1</sup> and 0.32 ± 0.33 µmol L<sup>-1</sup>, respectively).

The Gulf of Cádiz, during the period of this sampling, acted as a sink of CO<sub>2</sub>, with a mean rate of -0.18 ± 1.32 mmol m<sup>-2</sup> d<sup>-1</sup>, that would give rise to an annual flux of -0.07 mol C m<sup>-2</sup> yr<sup>-1</sup>. With the total surface of the study area (52.8·10<sup>2</sup> km<sup>2</sup>) and the mean annual flux during the 8 cruises, the uptake capacity estimated for the Gulf of Cádiz will be 14.9 Gg C year<sup>-1</sup>. The findings of previous studies carried out in the Gulf of Cádiz coincide with the behaviour observed in this study (Santana-Casiano et al., 2002; González-Dávila et al., 2003; Huertas et al., 2006; de la Paz et al., 2009; Ribas-Ribas et al., 2011), with the exception of the study by Ait-Ameur and Goyet (2006) in which it was estimated that the Gulf of Cádiz acts as a source of CO<sub>2</sub> to the atmosphere, although that study only corresponds to the summer season.

## 5. Conclusions

The mean value of pCO<sub>2</sub> in the eastern part of the Gulf of Cádiz found in this study (398.9 ± 15.5 µatm) indicates that it is undersaturated in CO<sub>2</sub> with respect to the atmosphere (402.1 ± 3.9 µatm). The spatiotemporal variation of pCO<sub>2</sub> found responds to the influence of different factors that usually affect its distribution in the littoral oceans. In global terms, when the mean values of the 8 cruises are considered, SST (pCO<sub>2</sub> (µatm) = 302.0 + 5.16 SST (°C), r<sup>2</sup> = 0.71) and biological activity (pCO<sub>2</sub> (µatm) = 425.0 - 59.15 [chlorophyll-a] (µg L<sup>-1</sup>), r<sup>2</sup> = 0.76) are the two principal factors that explain the temporal variability of pCO<sub>2</sub>. Over and above these general tendencies, there are spatial variations associated fundamentally with other processes. Firstly, the dominant effects in the shallower areas are also due to the continental inputs, the biological activity and the air-sea CO<sub>2</sub> exchange. Then pCO<sub>2</sub> values diminish progressively in line with increasing distance from the coast, out as far as an approximate depth of some 400 m. There is a relative increase of SST and pCO<sub>2</sub> as consequence of a change in the origin of the surface water, with the arrival of waters in a warm branch of the Azores current and the change produced by the biological activity.

The total T/B ratio (1.15) suggests that the distribution is principally controlled by the temperature. However, there is a different behaviour in this ratio if it is determined by bottom-depth intervals, related to the existence of non-thermal processes. In the proximity of the Guadalquivir estuary the ratio takes a value of 0.93 due to the continental inputs of C and nutrients, and in the zone around the coastal upwelling off Cape Trafalgar the ratio is 1.09. Furthermore, the actual characteristics of the surface water mass that originates under the influence of a branch of the Azores current also produce a decrease of the T/B ratio in the deeper zone studied (1.05 for depths > 600 m). In contrast, the highest T/B ratio values have been found in the SP transect, where values of up to 1.54 are obtained for depths greater than 100 m.

The annual uptake capacity of CO<sub>2</sub> by the surface waters in our study area is 14.9 Gg C year<sup>-1</sup>. The CO<sub>2</sub> fluxes present seasonal variation: these waters act as a source of CO<sub>2</sub> to the atmosphere in summer and autumn and as a sink in winter and spring. Based on the information available in the zone, there seems to have been a decrease in the capacity for CO<sub>2</sub> capture in the zone in recent decades.

495

### Author contributions

D.J.-L. wrote the manuscript with contributions from A.S., T.O. and J.F.. D.J.-L. and J.F. processed the experimental data. D.J.-L., T.O. and J.F. conceived the original idea. All authors contributed to collecting the data.

### Competing interests

500 The authors declare that they have no conflict of interest.

### Acknowledgments

D. Jiménez-López was financed by the University of Cádiz with a FPI fellowship (FPI-UCA) and A. Sierra was financed by the Spanish Ministry of Education with a FPU fellowship (FPU2014-04048). The authors gratefully acknowledge the Spanish Institute of Oceanography (IEO) for giving us the opportunity to participate in the STOCA cruises. We thank the crews of the R/V's Angeles Alvariño and Ramon Margalef for their assistance during field work. We are also grateful to Drs. X. A. Padin and F. F. Pérez (IIM-CSIC) for collaboration on the calibration of the sub-standards of CO<sub>2</sub>. This work was supported by the Spanish CICYT (Spanish Program for Science and Technology) under contract CTM2014-59244-C3.

505

### References

- Aït-Ameur, N. and Goyet, C.: Distribution and transport of natural and anthropogenic CO<sub>2</sub> in the Gulf of Cádiz, *Deep. Res. Part II Top. Stud. Oceanogr.*, 53, 1329–1343, <https://doi.org/10.1016/j.dsr2.2006.04.003>, 2006.
- Alvarez, I., Ospina-Alvarez, N., Pazos, Y., deCastro, M., Bernardez, P., Campos, M. J., Gomez-Gesteira, J. L., Alvarez-Ossorio, M. T., Varela, M., Gomez-Gesteira, M., and Prego, R.: A winter upwelling event in the Northern Galician Rias: Frequency and oceanographic implications, *Estuar. Coast. Shelf Sci.*, 82, 573–582, <https://doi.org/10.1016/j.ecss.2009.02.023>, 2009.
- Al Azhar, M., Lachkar, Z., Lévy, M., Smith, S.: Oxygen minimum zone contrasts between the Arabian Sea and the Bay of Bengal implied by differences in remineralization depth, *Geophys. Res. Lett.*, 44, 106–114, <https://doi.org/10.1002/2017GL075157>, 2017.
- Anfuso, E., Ponce, R., Castro, C. G., and Forja, J. M.: Coupling between the thermohaline, chemical and biological fields during summer 2006 in the northeast continental shelf of the Gulf of Cádiz (SW Iberian Peninsula), 47–56, *Sci. Mar.*, <https://doi.org/10.3989/scimar.2010.74s1047>, 2010.
- Arístegui, J., Barton, E. D., Álvarez-Salgado, X.A., Santos, A.M.P., Figueiras, F.G., Kifani, S., Hernández-León, S., Mason, E., Machú, E., and Demarcq, H.: Sub-regional ecosystem variability in the Canary Current upwelling, *Prog. Oceanogr.*, 83, 33–48, <https://doi.org/10.1016/j.pocean.2009.07.031>, 2009.
- Armi, L., and Farmer, D. M.: The flow of Mediterranean water through the Strait of Gibraltar, *Prog. Oceanogr.*, 21, 1–105, [https://doi.org/10.1016/0079-6611\(88\)90055-9](https://doi.org/10.1016/0079-6611(88)90055-9), 1988.
- Arnone, V., González-Dávila, M., and Santana-Casiano, J. M.: CO<sub>2</sub> fluxes in the South African coastal region, *Mar. Chem.*, 195, 41–49, <https://doi.org/10.1016/j.marchem.2017.07.008>, 2017.
- Arruda, R., Calil, P. H. R., Bianchi, A. A., Doney, S. C., Gruber, N., Lima, I., and Turi, G.: Air-sea CO<sub>2</sub> fluxes and the controls

525

on ocean surface pCO<sub>2</sub> seasonal variability in the coastal and open-ocean southwestern Atlantic Ocean: A modeling study, *Biogeosciences*, 12, 5793–5809, <https://doi.org/10.5194/bg-12-5793-2015>, 2015.

530

Astor, Y. M., Scranton, M. I., Muller-Karger, F., Bohrer, R., and Garcia, J.: CO<sub>2</sub> variability at the CARIACO tropical coastal upwelling time series station, *Mar. Chem.*, 97, 245–261, <https://doi.org/10.1016/j.marchem.2005.04.001>, 2005.

Baringer, M. O. N., and Price, J. F.: A review of the physical oceanography of the Mediterranean outflow, *Mar. Geol.*, 155, 63–82, [https://doi.org/10.1016/S0025-3227\(98\)00141-8](https://doi.org/10.1016/S0025-3227(98)00141-8), 1999.

535

Bates, N. R., Merlivat, L., Beaumont, L., and Pequignet, A. C.: Intercomparison of shipboard and moored CARIOCA buoy seawater fCO<sub>2</sub> measurements in the Sargasso Sea, *Mar. Chem.*, 72, 239–255, [https://doi.org/10.1016/S0304-4203\(00\)00084-0](https://doi.org/10.1016/S0304-4203(00)00084-0), 2000.

Bauer, J. E., Cai, W. J., Raymond, P. A., Bianchi, T. S., Hopkinson, C. S., and Regnier, P. A.: The changing carbon cycle of the coastal ocean, *Nature*, 504, 61–70, <https://doi.org/10.1038/nature12857>, 2013.

540

Bellanco, M. J., and Sánchez-Leal, R. F.: Spatial distribution and intra-annual variability of water masses on the Eastern Gulf of Cádiz seabed, *Cont. Shelf Res.*, 128, 26–35, <https://doi.org/10.1016/j.csr.2016.09.001>, 2016.

Borges, A. V., and Frankignoulle, M.: Daily and seasonal variations of the partial pressure of CO<sub>2</sub> in surface seawater along Belgian and southern Dutch coastal areas, *J. Mar. Syst.*, 19, 251–266, [https://doi.org/10.1016/S0924-7963\(98\)00093-1](https://doi.org/10.1016/S0924-7963(98)00093-1), 1999.

545

Borges, A. V., and Frankignoulle, M.: Distribution of surface carbon dioxide and air-sea exchange in the upwelling system off the Galician coast, *Global Biogeochem. Cycles*, 16, 1020, <https://doi.org/10.1029/2000GB001385>, 2002.

Borges, A. V., Delille, B., and Frankignoulle, M.: Budgeting sinks and sources of CO<sub>2</sub> in the coastal ocean: Diversity of ecosystems counts, *Geophys. Res. Lett.*, 32, L14601, <https://doi.org/10.1029/2005GL023053>, 2005.

Borges, A. V., Schiettecatte, L. S., Abril, G., Delille, B., and Gazeau, F.: Carbon dioxide in European coastal waters, *Estuar. Coast. Shelf Sci.*, 70, 375–387, <https://doi.org/10.1016/j.ecss.2006.05.046>, 2006.

550

Borges, A. V., and Abril, G.: *Treatise on Estuarine and Coastal Science*, Elsevier, 328 pp., 2011.

Burdige, D. J.: Preservation of Organic Matter in Marine Sediments : Controls, Mechanisms, and an Imbalance in Sediment Organic Carbon Budgets?, *Chem. Rev.*, 107, 467–485, <https://doi.org/10.1021/cr050347q>, 2007.

Burgos, M., Ortega, T., and Forja, J.: Carbon Dioxide and Methane Dynamics in Three Coastal Systems of Cádiz Bay (SW Spain), *Estuaries and Coasts*, 41, 1069–1088, <https://doi.org/10.1007/s12237-017-0330-2>, 2018.

555

Cai, W. J., Wang, Z. A., and Wang, Y.: The role of marsh-dominated heterotrophic continental margins in transport of CO<sub>2</sub> between the atmosphere, the land-sea interface and the ocean, *Geophys. Res. Lett.*, 30, 1–4, <https://doi.org/10.1029/2003GL017633>, 2003.

Cai, W. J., Dai, M., and Wang, Y.: Air-sea exchange of carbon dioxide in ocean margins: A province-based synthesis, *Geophys. Res. Lett.*, 33, 2–5, <https://doi.org/10.1029/2006GL026219>, 2006.

560

Cai, W. J.: Estuarine and coastal ocean carbon paradox: CO<sub>2</sub> sinks or sites of terrestrial carbon incineration?, *Annual review of marine science*, 3, 123–145, <https://doi.org/10.1146/annurev-marine-120709-142723>, 2011.

Cai, W. J., Hu, Xiping., Huang, W. J., Murrell, M. C., Lehrter, J. C., Lohrenz, S. E., Chou, W. C., Zhai, W., Hollibaugh, J. T., Wang, Y., Zhao, P., Guo, X., Gunderser, K., Dai, M., and Gong, G. C.: Acidification of subsurface coastal waters enhanced by eutrophication, *Nature Geoscience*, 4, <https://doi.org/10.1038/ngeo1297>, 2011.

565

Carvalho, A. C. O., Marins, R. V., Dias, F. J. S., Rezende, C. E., Lefèvre, N., Cavalcante, M. S., and Eschrique, S. A.: Air-sea CO<sub>2</sub> fluxes for the Brazilian northeast continental shelf in a climatic transition region, *J. Mar. Syst.*, 173, 70–80, <https://doi.org/10.1016/j.jmarsys.2017.04.009>, 2017.

Chen, C. T. A., and Borges, A. V.: Reconciling opposing views on carbon cycling in the coastal ocean: Continental shelves as sinks and near-shore ecosystems as sources of atmospheric CO<sub>2</sub>, *Deep. Res. Part II Top. Stud. Oceanogr.*, 56, 578–590,

570

<https://doi.org/10.1016/j.dsr2.2009.01.001>, 2009.

- Chen, C. T. A., Huang, T. H., Chen, Y. C., Bai, Y., He, X., and Kang, Y.: Air-sea exchanges of coin the world's coastal seas, *Biogeosciences*, 10, 6509–6544, <https://doi.org/10.5194/bg-10-6509-2013>, 2013.
- Clargo, N. M., Salt, L. A., Thomas, H., and de Baar, H. J. W.: Rapid increase of observed DIC and pCO<sub>2</sub> in the surface waters of the North Sea in the 2001–2011 decade ascribed to climate change superimposed by biological processes, *Mar. Chem.*, 177, 566–581, <https://doi.org/10.1016/j.marchem.2015.08.010>, 2015.
- Cohen, J. E., Small, C., Mellinger, A., Gallup, J., and Sachs, J.: Estimates of coastal populations, *Science*, 278, 1209–1213, <https://doi.org/10.1126/science.278.5341.1209c>, 1997.
- Criado-Aldeanueva, F., García-Lafuente, J., Vargas, J. M., Del Río, J., Vázquez, A., Reul, A., and Sánchez, A.: Distribution and circulation of water masses in the Gulf of Cádiz from in situ observations, *Deep. Res. Part II Top. Stud. Oceanogr.*, 53, 1144–1160, <https://doi.org/10.1016/j.dsr2.2006.04.012>, 2006.
- Dafner, E. V., González-Dávila, M., Santana-Casiano, J. M., and Sempere, R.: Total organic and inorganic carbon exchange through the Strait of Gibraltar in September 1997, *Deep-Sea Res. Part I Oceanogr. Res. Pap.*, 48, 1217–1235, [https://doi.org/10.1016/S0967-0637\(00\)00064-9](https://doi.org/10.1016/S0967-0637(00)00064-9), 2001.
- de Haas, H., vanWeering, T. C. E., and de Stieger, H.: Organic carbon in shelf seas: sinks or sources, processes and products, *Cont. Shelf Res.*, 22, 691–717, [https://doi.org/10.1016/S0278-4343\(01\)00093-0](https://doi.org/10.1016/S0278-4343(01)00093-0), 2002.
- de la Paz, M., Gómez-Parra, A., and Forja, J.: Inorganic carbon dynamic and air-water CO<sub>2</sub> exchange in the Guadalquivir Estuary (SW Iberian Península), *J. Mar. Syst.*, 68, 265–277, <https://doi.org/10.1016/j.jmarsys.2006.11.011>, 2007.
- de la Paz, M., Debelius, B., Macías, D., Vázquez, A., Gómez-Parra, A., and Forja, J. M.: Tidal-induced inorganic carbon dynamics in the Strait of Gibraltar, *Cont. Shelf Res.*, 28, 1827–1837, <https://doi.org/10.1016/j.csr.2008.04.012>, 2008a.
- de la Paz, M., Gómez-Parra, A., and Forja, J.: Tidal-to-seasonal variability in the parameters of the carbonate system in a shallow tidal creek influenced by anthropogenic inputs, Rio San Pedro (SW Iberian Península), *Cont. Shelf Res.*, 28, 1394–1404, <https://doi.org/10.1016/j.csr.2008.04.002>, 2008b.
- de la Paz, M., Gómez-Parra, A., and Forja, J. M.: Seasonal variability of surface fCO<sub>2</sub> in the Strait of Gibraltar, *Aquat. Sci.*, 71, 55–64, <https://doi.org/10.1007/s00027-008-8060-y>, 2009.
- de la Paz, M., Padín, X. A., Ríos, A.F., and Pérez, F. F.: Surface fCO<sub>2</sub> variability in the Loire plume and adjacent shelf waters: High spatio-temporal resolution study using ships of opportunity, *Mar. Chem.*, 118, 108–118, <https://doi.org/10.1016/j.marchem.2009.11.004>, 2010.
- DOE.: in: Guide to best practices for ocean CO<sub>2</sub> measurement, edited by: Dickson, A. G. Sabine, C. L. and Christian, J.R., Sidney, British Columbia, North Pacific Marine Science Organization, 191 pp., 2007.
- Echevarría, F., García-Lafuente, J., Bruno, M., Gorsky, G., Goutx, M., González, N., García, C. M., Gómez, F., Vargas, J. M., Picheral, M., Striby, L., Varela, M., Alonso, J. J., Reul, A., Cózar, A., Prieto, L., Sarhan, T., Plaza, F., and Jiménez-González, F.: Physical-biological coupling in the Strait of Gibraltar, *Deep Sea Res. Part II Top. Stud. Oceanogr.*, 49, 4115–4130, [https://doi.org/10.1016/S0967-0645\(02\)00145-5](https://doi.org/10.1016/S0967-0645(02)00145-5), 2002.
- Feely, R. A., Boutin, J., Cosca, C. E., Dandonneau, Y., Etcheto, J., Inoue, H. Y., Ishii, M., Quéré, C. L., Mackey, D. J., McPhaden, M., Metzl, N., Poisson, A., Wanninkhof, R.: Seasonal and interannual variability of CO<sub>2</sub> in the equatorial Pacific, *Deep Sea Res. II Top. Stud. Oceanogr.*, 49, 2443–2469, [https://doi.org/10.1016/S0967-0645\(02\)00044-9](https://doi.org/10.1016/S0967-0645(02)00044-9), 2002.
- Fennel, K., and Wilkin, J.: Quantifying biological carbon export for the northwest North Atlantic continental shelves, *Geophys. Res. Lett.*, 36, 2–5, <https://doi.org/10.1029/2009GL039818>, 2009.
- Ferrón, S., Alonso-Pérez, F., Anfuso, E., Murillo, F. J., Ortega, T., Castro, C. G., Forja, J. M.: Benthic nutrient recycling on the northeastern shelf of the Gulf of Cádiz (SW Iberian Península), *Mar. Ecol. Prog. Ser.*, 390, 79–95, <https://doi.org/10.3354/meps08199>, 2009.



- Fiúza, A. F., de Macedo, M., and Guerreiro, M.: Climatological space and time variation of the Portuguese coastal upwelling, *Oceanol. Acta*, 5, 31–40, 1982.
- 615 Frankignoulle, M., and Borges, A. V.: European continental shelf as a significant sink for atmospheric carbon dioxide, *Global Biogeochem. Cycles*, 15, 569–576, <https://doi.org/10.1029/2000GB001307>, 2001.
- Friederich, G. E., Walz, P. M., Burczynski, M. G., and Chavez, F. P.: Inorganic carbon in the central California upwelling system during the 1997–1999 El Niño-La Niña event, *Prog. Oceanogr.*, 54, 185–203, [https://doi.org/10.1016/S0079-6611\(02\)00049-6](https://doi.org/10.1016/S0079-6611(02)00049-6), 2002.
- 620 Friederich, G. E., Ledesma, J., Ulloa, O., and Chavez, F. P.: Air-sea carbon dioxide fluxes in the coastal southeastern tropical Pacific, *Prog. Oceanogr.*, 79, 156–166, <https://doi.org/10.1016/j.pocean.2008.10.001>, 2008.
- Friedl, G., Dinkel, C., and Wehrli, B.: Benthic fluxes of nutrients in the northwestern Black Sea, *Mar. Chem.*, 62, 77–88, [https://doi.org/10.1016/S0304-4203\(98\)00029-2](https://doi.org/10.1016/S0304-4203(98)00029-2), 1998.
- García, C. M., Prieto, L., Vargas, M., Echevarría, F., García-Lafuente, J., Ruiz, J., and Rubín, J. P.: Hydrodynamics and the spatial distribution of plankton and TEP in the Gulf of Cádiz (SW Iberian Peninsula), *J. Plankton Res.*, 24, 817–833, <https://doi.org/10.1093/plankt/24.8.817>, 2002.
- 625 Garcia-Lafuente, J., Delgado, J., Criado-Aldeanueva, F., Bruno, M., del Rio, J., and Vargas, J. M.: Water mass circulation on the continental shelf of the Gulf of Cádiz, *Deep Sea Res. Part II Top. Stud. Oceanogr.*, 53, 1182–1197, <https://doi.org/10.1016/j.dsr2.2006.04.011>, 2006.
- 630 García Lafuente, J., and Ruiz, J.: The Gulf of Cádiz pelagic ecosystem: A review, *Prog. Oceanogr.*, 74, 228–251, <https://doi.org/10.1016/j.pocean.2007.04.001>, 2007.
- González-Dávila, M., Santana-Casiano, J. M., and Dafner, E. V.: Winter mesoscale variations of carbonate system parameters and estimates of CO<sub>2</sub> fluxes in the Gulf of Cádiz, northeast Atlantic Ocean (February 1998), *J. Geophys. Res.*, 108, 1–11, <https://doi.org/10.1029/2001JC001243>, 2003.
- 635 González-Dávila, M., Santana-Casiano, J.M., and Ucha, I.R.: Seasonal variability of fCO<sub>2</sub> in the Angola-Benguela region, *Prog. Oceanogr.*, 83, 124–133, <https://doi.org/10.1016/j.pocean.2009.07.033>, 2009.
- González-Dávila, M., Santana Casiano, J. M., and Machín, F.: Changes in the partial pressure of carbon dioxide in the Mauritanian-Cape Verde upwelling region between 2005 and 2012, *Biogeosciences*, 14, 3859–3871, <https://doi.org/10.5194/bg-14-3859-2017>, 2017.
- 640 González-García, C., Forja, J., González-Cabrera, M. C., Jiménez, M. P., and Lubián, L. M.: Annual variations of total and fractionated chlorophyll and phytoplankton groups in the Gulf of Cádiz, *Sci. Total Environ.*, 613, 1551–1565, <https://doi.org/10.1016/j.scitotenv.2017.08.292>, 2018.
- Gould, W. J.: Physical oceanography of the Azores Front, *Prog. Oceanogr.*, 14, 167–190, [https://doi.org/10.1016/0079-6611\(85\)90010-2](https://doi.org/10.1016/0079-6611(85)90010-2), 1985.
- 645 Grasshoff, K., Erhardt, M., and Kremiling, K.: *Methods of Seawater Analysis*, Verlag Chemie, 419 pp., 1983.
- Gypens, N., Lacroix, G., Lancelot, C., and Borges, A. V.: Seasonal and inter-annual variability of air–sea CO<sub>2</sub> fluxes and seawater carbonate chemistry in the Southern North Sea, *Prog. Oceanogr.*, 88, 59–77, <https://doi.org/10.1016/j.pocean.2010.11.004>, 2011.
- Hales, B., Takahashi, T., and Bandstra, L.: Atmospheric CO<sub>2</sub> uptake by a coastal upwelling system, *Global Biogeochem. Cycles*, 19, 1–11, <https://doi.org/10.1029/2004GB002295>, 2005.
- 650 Hofmann, E. E., Cahill, B., Fennel, K., Friedrichs, M. A. M., Hyde, K., Lee, C., Mannino, A., Najjar, R. G., O'Reilly, J. E., Wilkin, J., and Xue, J.: Modeling the Dynamics of Continental Shelf Carbon, *Annu. Rev. Mar. Sci.*, 3, 93–122, <http://dx.doi.org/10.1146/annurev-marine-120709-142740>, 2011.
- Huertas, E., Navarro, G., Rodríguez-Gálvez, S., and Prieto, L.: The influence of phytoplankton biomass on the spatial

- 655 distribution of carbon dioxide in surface sea water of a coastal area of the Gulf of Cádiz (southwestern Spain), *Can. J. Bot.*, 83, 929–940, <https://doi.org/10.1139/b05-082>, 2005.
- Huertas, I. E., Navarro, G., Rodríguez-Gálvez, S., and Lubián, L. M.: Temporal patterns of carbon dioxide in relation to hydrological conditions and primary production in the northeastern shelf of the Gulf of Cádiz (SW Spain), *Deep. Res. Part II Top. Stud. Oceanogr.*, 53, 1344–1362, <https://doi.org/10.1016/j.dsr2.2006.03.010>, 2006.
- 660 Ito, R. G., Garcia, C. A. E., and Tavano, V. M.: Net sea-air CO<sub>2</sub> fluxes and modelled pCO<sub>2</sub> in the southwestern subtropical Atlantic continental shelf during spring 2010 and summer 2011, *Cont. Shelf Res.*, 119, 68–84, <https://doi.org/10.1016/j.csr.2016.03.013>, 2016.
- Jahnke, R., Richards, M., Nelson, J., Robertson, C., Rao, A., and Jahnke, D.: Organic matter remineralization and porewater exchange rates in permeable South Atlantic Bight continental shelf sediments, *Cont. Shelf Res.*, 25, 1433–1452, <https://doi.org/10.1016/j.csr.2005.04.002>, 2005.
- 665 Jiang, L. Q., Cai, W. J., Wanninkhof, R., Wang, Y., and Lüger, H.: Air-sea CO<sub>2</sub> fluxes on the U.S. South Atlantic Bight: Spatial and seasonal variability, *J. Geophys. Res.*, 113, C07019, <https://doi.org/10.1029/2007JC004366>, 2008.
- Jiang, L. Q., Cai, W. J., Wang, Y., and Bauer, J. E.: Influence of terrestrial inputs on continental shelf carbon dioxide, *Biogeosciences*, 10, 839–849, <https://doi.org/10.5194/bg-10-839-2013>, 2013.
- 670 Johnson, J., and Stevens, I.: A fine resolution model of the eastern North Atlantic between the Azores, the Canary Islands and the Gibraltar Strait, *Deep. Res. Part I Oceanogr. Res. Pap.*, 47, 875–899, [https://doi.org/10.1016/S0967-0637\(99\)00073-4](https://doi.org/10.1016/S0967-0637(99)00073-4), 2000.
- Kahl, L. C., Bianchi, A. A., Osiroff, A. P., Pino, D. R., and Piola, A. R.: Distribution of sea-air CO<sub>2</sub> fluxes in the Patagonian Sea: seasonal, biological and thermal effects, *Cont. Shelf Res.*, 143, 18–28, <https://doi.org/10.1016/j.csr.2017.05.011>, 2017.
- 675 Käse, R. H., Zenk, W., Sanford, T. B., and Hiller, W.: Currents, Fronts and Eddy Fluxes in the Canary Basin, *Progr. Oceanogr.*, 14, 231–257, [https://doi.org/10.1016/0079-6611\(85\)90013-8](https://doi.org/10.1016/0079-6611(85)90013-8), 1985.
- Klein, B., and Siedler, G.: On the origin of the Azores Current, *J. Geophys. Res.*, 94, 6159–6168, <https://doi.org/10.1029/JC094iC05p06159>, 1989.
- 680 Körtzinger, A., Thomas, H., Schneider, B., Gronau, N., Mintrop, L., and Duinker, J. C.: At-sea intercomparison of two newly designed underway pCO<sub>2</sub> systems encouraging results, *Mar. Chem.*, 52, 133–145, [https://doi.org/10.1016/0304-4203\(95\)00083-6](https://doi.org/10.1016/0304-4203(95)00083-6), 1996.
- Landschützer, P., Gruber, N., Haumann, F. A., Rödenbeck, C., Bakker, D. c. E., van Heuven, S., Hoppema, M., Metzl, N., Sweeney, C., Takahashi, T., Tilbrook, B., Wanninkhof, R.: The reinvigoration of the Southern Ocean carbon sink, *Science*, 349, 1221–1224, <https://doi.org/10.1126/science.aab2620>, 2015.
- 685 Laruelle, G. G., Dürr, H. H., Slomp, C. P., and Borges, A. V.: Evaluation of sinks and sources of CO<sub>2</sub> in the global coastal ocean using a spatially-explicit typology of estuaries and continental shelves, *Geophys. Res. Lett.*, 37, L15607, <https://doi.org/10.1029/2010GL043691>, 2010.
- Laruelle, G. G., Lauerwald, R., Pfeil, B., and Regnier, P.: Regionalized global budget of the CO<sub>2</sub> exchange at the air-water interface in continental shelf seas, *Global Biogeochem. Cycles*, 28, 1199–1214, <https://doi.org/10.1002/2014GB004832>, 2014.
- 690 Laruelle, G. G., Landschützer, P., Gruber, N., Ti, J. L., Delille, B., and Regnier, P.: 2017. Global high-resolution monthly pCO<sub>2</sub> climatology for the coastal ocean derived from neural network interpolation, *Biogeosciences*, 14, 4545–4561, <https://doi.org/10.5194/bg-14-4545-2017>, 2017.
- 695 Lefèvre, N., da Silva Dias, F. J., de Torres, A. R., Noriega, C., Araujo, M., de Castro, A. C. L., Rocha, C., Jiang, S., and Ibánhez, J. S. P.: A source of CO<sub>2</sub> to the atmosphere throughout the year in the Maranhense continental shelf (2°30'S,

Brazil), *Cont. Shelf Res.*, 141, 38–50, <https://doi.org/10.1016/j.csr.2017.05.004>, 2017.

- 700 Le Quéré, C., Andrew, R. M., Friedlingstein, P., Sitch, S., Pongratz, J., Manning, A. C., Korsbakken, J. I., Peters, G. P.,  
Canadell, J. G., Jackson, R. B., Boden, T. A., Tans, P. P., Andrews, O. D., Arora, V. K., Bakker, D. C. E., Barbero, L.,  
Becker, M., Betts, R. A., Bopp, L., Chevallier, F., Chini, L. P., Ciais, P., Cosca, C.E., Cross, J., Currie, K., Gasser, T.,  
705 Harris, I., Hauck, J., Haverd, V., Houghton, R. A., Hunt, C. W., Hurtt, G., Ilyina, T., Jain, A. K., Kato, E., Kautz, M.,  
Keeling, R. F., Klein Goldewijk, K., Körtzinger, A., Landschützer, P., Lefèvre, N., Lenton, A., Lienert, S., Lima, I.,  
Lombardozzi, D., Metzl, N., Millero, F., Monteiro, P. M. S., Munro, D. R., Nabel, J. E. M. S., Nakaoka, S. I., Nojiri, Y.,  
710 Padín, X. A., Peregon, A., Pfeil, B., Pierrot, D., Poulter, B., Rehder, G., Reimer, J., Rödenbeck, C., Schwinger, J., Séférian,  
R., Skjelvan, I., Stocker, B. D., Tian, H., Tilbrook, B., van der Laan-Luijkx, I. T., van der Werf, G. R., van Heuven, S.,  
Viovy, N., Vuichard, N., Walker, A. P., Watson, A. J., Wiltshire, A. J., Zaehle, S. and Zhu, D.: Global Carbon Budget  
2017. *Earth System Science Data Discussions*, 1–79, <https://doi.org/10.5194/essd-2017-123>, 2017.
- Litt, E. J., Hardman-Mountford, N. J., Blackford, J. C., and Mitchelson-Jacob, G. A. Y.: Biological control of pCO<sub>2</sub> at station  
L4 in the Western English Channel over 3 years, *J. Plank. Res.*, 32, 621–629, <https://doi.org/10.1093/plankt/fbp133>, 2018.
- 715 Liu, S. M., Zhu, B. D., Zhang, J., Wu, Y., Liu, G. S., Deng, B., Zhao, M. X., Liu, G. Q., Du, J. Z., Ren, J. L., and Zhang, G.  
L.: Environmental change in Jiaozhou Bay recorded by nutrient components in sediments, *Mar. Pollut. Bull.*, 60, 1591–  
1599, <https://doi.org/10.1016/j.marpolbul.2010.04.003>, 2010.
- Lohrenz, S. E., Cai, W. J., Chen, F., Chen, X., and Tuel, M.: Seasonal variability in air-sea fluxes of CO<sub>2</sub> in a river-influenced  
coastal margin, *J. Geophys. Res. Ocean.*, 115, 1–13, <https://doi.org/10.1029/2009JC005608>, 2010.
- 720 Lueker, T. J., Dickson, A. G., and Keeling, C. D.: Ocean pCO<sub>2</sub> calculated from dissolved inorganic carbon alkalinity, and  
equations for  $K_1$  and  $K_2$ : validation based on laboratory measurements of CO<sub>2</sub> in gas and seawater at equilibrium, *Mar.*  
*Chem.*, 70, 105–119, [https://doi.org/10.1016/S0304-4203\(00\)00022-0](https://doi.org/10.1016/S0304-4203(00)00022-0), 2000.
- Mackenzie, F. T., Bowers, J. M., Charlson, R. J., Hofmann, E. E., Knauer, G. A., Kraft, J. C., Nöthig, E. M., Quack, B., Walsh,  
J. J., Whitfield, M., and Wollast, R.: What is the importance of ocean margin processes in global change?, in: *Ocean*  
*Margin Processes in Global Change*, edited by: Mantoura, R. F. C., Martin, J. M., Wollast, R., Dahlem workshop reports,  
725 J. Wiley & Sons, Chichester, 433–454, 1991.
- Mackenzie, F. T., Lerman, A., and Andersson, A. J.: Past and present of sediment and carbon biogeochemical cycling models,  
*Biogeosciences*, 1, 11–32, <https://doi.org/10.5194/bg-1-11-2004>, 2004.
- Michaels, A. F., Karl, D. M., and Capone, D. G.: Element stoichiometry, new production and nitrogen fixation, *Oceanography*,  
730 14, 68–77, <https://doi.org/10.5670/oceanog.2001.08>, 2001.
- Millero, F.J.: Thermodynamics of the carbon dioxide system in the oceans, *Geoch. Cosmo. Acta*, 59, 661–677,  
[https://doi.org/10.1016/0016-7037\(94\)00354-O](https://doi.org/10.1016/0016-7037(94)00354-O), 1995.
- Muller-Karger, F. E., Varela, R., Thunell, R., Luerssen, R., Hu, C., and Walsh, J. J.: The importance of continental margins in  
the global carbon cycle, *Geophys. Res. Lett.*, 32, 1–4, <https://doi.org/10.1029/2004GL021346>, 2005.
- 735 Navarro, G., and Ruiz, J.: Spatial and temporal variability of phytoplankton in the Gulf of Cádiz through remote sensing  
images, *Deep. Res. Part II Top. Stud. Oceanogr.*, 53, 11–13, <https://doi.org/10.1016/j.dsr2.2006.04.014>, 2006.
- Olsen, A., Brown, K. R., Chierici, M., Johannessen, T., Neill, C.: Sea-surface CO<sub>2</sub> fugacity in the subpolar North Atlantic,  
*Biogeosciences*, 5, 535–547, <https://doi.org/10.5194/bg-5-535-2008>, 2008.
- Omar, A. M., Olsen, A., Johannessen, T., Hoppema, M., Thomas, H., Borges, A. V.: Spatiotemporal variations of fCO<sub>2</sub> in the  
740 North Sea, *Ocean Science*, 6, 77–89, <https://doi.org/10.5194/os-6-77-2010>, 2010.
- Padín, X. A., Navarro, G., Gilcoto, M., Rios, A. F., and Pérez, F. F.: Estimation of air-sea CO<sub>2</sub> fluxes in the Bay of Biscay  
based on empirical relationships and remotely sensed observations, *J. Mar. Syst.*, 75, 280–289,  
<https://doi.org/10.1016/j.jmarsys.2008.10.008>, 2009.

- 740 Padin, X. A., Vázquez Rodríguez, M., Castaño, M., Velo, A., Alonso Pérez, F., Gago, J., Gilcoto, M., Álvarez, M., Pardo, P. C., de la Paz, M., Ríos, A.F., and Pérez, F. F.: Air-Sea CO<sub>2</sub> fluxes in the Atlantic as measured during boreal spring and autumn, *Biogeosciences*, 7, 1587–1606, <http://dx.doi.org/10.5194/bg-7-1587-2010>, 2010.
- Parsons, T. R., Maita, Y., and Lalli, C. M.: *A Manual Of Chemical And Biological Methods For Seawater Analysis*, Pergamon Press, Oxford, 172 pp., 1984.
- 745 Peliz, A., Dubert, J., Marchesiello, P., and Teles-Machado, A.: Surface circulation in the Gulf of Cádiz: Model and mean flow structure, *J. Geophys. Res. Ocean.*, 112, 1–20, <https://doi.org/10.1029/2007JC004159>, 2007.
- Peliz, A., Marchesiello, P., Santos, A. M. P., Dubert, J., Teles-Machado, A., Marta-Almeida, M., and Le Cann, B.: Surface circulation in the Gulf of Cádiz: 2. Inflow-outflow coupling and the Gulf of Cádiz slope current, *J. Geophys. Res. Ocean.*, 114, 1–16, <https://doi.org/10.1029/2008JC004771>, 2009.
- 750 Prieto, L., Garcia, C. M., Corzo, A., Ruiz Segura, J., and Echevarria, F.: Phytoplankton, bacterioplankton and nitrate reductase activity distribution in relation to physical structure in the northern Alboran Sea and Gulf of Cádiz (southern Iberian Península), *Bol. Inst. Esp. Oceanogr.*, 15, 401–411, 1999.
- Qin, B. Y., Tao, Z., Li, Z. W., and Yang, X. F.: Seasonal changes and controlling factors of sea surface pCO<sub>2</sub> in the Yellow Sea, In *IOP Conf. Ser.: Earth Environ. Sci.*, 17, 012025, <https://doi.org/10.1088/1755-1315/17/1/012025>, 2014.
- 755 Qu, B., Song, J., Yuan, H., Li, X., and Li, N.: Air-sea CO<sub>2</sub> exchange process in the southern Yellow Sea in April of 2011, and June, July, October of 2012, *Cont. Shelf Res.*, 80, 8–19, <https://doi.org/10.1016/j.csr.2014.02.001>, 2014.
- Rabouille, C., Mackenzie, F. T., and Ver, L. M.: Influence of the human perturbation on carbon, nitrogen, and oxygen biogeochemical cycles in the global coastal ocean, *Geoch. Cosmo. Acta*, 65, 3615–3641, [https://doi.org/10.1016/S0016-7037\(01\)00760-8](https://doi.org/10.1016/S0016-7037(01)00760-8), 2001.
- 760 Redfield, A. C., Ketchum, B. H., Richards, F. A.: The influence of organisms on the composition of sea-water, In M. N. Hill [ed.], *The sea*, 2, Interscience, 26–77 pp., 1963.
- Reimer, J. J., Cai, W.-J., Xue, L., Vargas, R., Noakes, S., Hu, X., Signorini, S. R., Mathis, J. T., Feely, R. A., Sutton, A. J., Sabine, C., Musielewicz, S., Chen, B., Wanninkhof, R.: Time series of pCO<sub>2</sub> at a coastal mooring: Internat consistency, seasonal cycles, and interannual variability, *Cont. Shelf Res.*, 145, 95–108, <https://doi.org/10.1016/j.csr.2017.06.022>, 2017.
- 765 Ribas-Ribas, M., Gómez-Parra, A., and Forja, J. M.: Air-sea CO<sub>2</sub> fluxes in the north-eastern shelf of the Gulf of Cádiz (southwest Iberian Península), *Mar. Chem.*, 123, 56–66, <https://doi.org/10.1016/j.marchem.2010.09.005>, 2011.
- Ribas-Ribas, M., Sobrino, C., Debelius, B., Lubián, L.M., Ponce, R., Gómez-Parra, A., and Forja, J. M.: Picophytoplankton and carbon cycle on the northeastern shelf of the Gulf of Cádiz (SW Iberian Península), *Sci. Mar.*, 77, 49–62, <https://doi.org/10.3989/scimar.03732.27D>, 2013.
- 770 Ríos, A. F., Pérez, F. F., Álvarez, M. A., Mintrop, L., González-Dávila, M., Santana-Casiano, J. M., Lefèvre, N., and Watson, A. J.: Seasonal sea-surface carbon dioxide in the Azores area, *Mar. Chem.*, 96, 35–51, <https://doi.org/10.1016/j.marchem.2004.11.001>, 2005.
- Sala, I., Caldeira, R. M. A., Estrada-Allis, S. N., Froufe, E., and Couvelard, X.: Lagrangian transport pathways in the northeast Atlantic and their environmental impact, *Limnol. Oceanogr. Fluids Environ.*, 3, 40–60, <https://doi.org/10.1215/21573689-2152611>, 2013.
- 775 Sala, I., Navarro, G., Bolado-Penagos, M., Echevarría, F., and García, C. M.: High-Chlorophyll-Area Assessment Based on Remote Sensing Observations: The Case Study of Cape Trafalgar, *Remote Sensing*, 10, 165, <https://doi.org/10.3390/rs10020165>, 2018.
- 780 Sánchez, R. F., and Relvas, P.: Spring-summer climatological circulation in the upper layer in the region of Cape St. Vincent, Southwest Portugal, *ICES J. Mar. Sci.*, 60, 1232–1250, [https://doi.org/10.1016/S1054-3139\(03\)00137-1](https://doi.org/10.1016/S1054-3139(03)00137-1), 2003.

- Sánchez, R. F., Relvas, P., Martinho, A., and Miller, P.: Physical description of an upwelling filament west of Cape St. Vincent in late October 2004, *J. Geophys. Res. Oceans*, 113, C07044, <https://doi.org/10.1029/2007JC004430>, 2008.
- 785 Sánchez-Leal, R. F., Bellanco, M. J., Fernández-Salas, L. M., García-Lafuente, J., Gasser-Rubinat, M., González-Pola, C., Hernández-Molina, F. J., Pelegrí, J. L., Peliz, A., Relvas, P., Roque, D., Ruiz-Villarreal, M., Sammartino, S. and Sánchez-Garrido, J. C.: The Mediterranean Overflow in the Gulf of Cádiz: A rugged journey, *Sci. Adv.*, 3, eaao0609, <https://doi.org/10.1126/sciadv.aao0609>, 2017.
- Santana-Casiano, J. M., Gonzalez-Davila, M., and Laglera, L. M.: The carbon dioxide system in the Strait of Gibraltar, *Deep Sea Res. Part II Top. Stud. Oceanogr.*, 49, 4145–4161, [https://doi.org/10.1016/S0967-0645\(02\)00147-9](https://doi.org/10.1016/S0967-0645(02)00147-9), 2002.
- 790 Santana-Casiano, J., González-Dávila, M., and Ucha, I.: Carbon dioxide fluxes in the Benguela upwelling system during winter and spring: A comparison between 2005 and 2006, *Deep Sea Res. II Top. Stud. Oceanogr.*, 56, 533–541, <https://doi.org/10.1016/j.dsr2.2008.12.010>, 2009.
- Schiettecatte, L. S., Thomas, H., Bozec, Y., and Borges, A. V.: High temporal coverage of carbon dioxide measurements in the Southern Bight of the North Sea, *Mar. Chem.*, 106, 161–173, <https://doi.org/10.1016/j.marchem.2007.01.001>, 2007.
- 795 Shaw, E. C., and McNeil, B. I.: Seasonal variability in carbonate chemistry and air-sea CO<sub>2</sub> fluxes in the southern Great Barrier Reef, *Mar. Chem.*, 158, 49–58, <https://doi.org/10.1016/j.marchem.2013.11.007>, 2014.
- Shim, J. H., Kim, D., Kang, Y. C., Lee, J. H., Jang, S. T., and Kim, C. H.: Seasonal variations in pCO<sub>2</sub> and its controlling factors in surface seawater of the northern East China Sea, *Cont. Shelf Res.*, 27, 2623–2636, <https://doi.org/10.1016/j.csr.2007.07.005>, 2007.
- 800 Smith, S. V., and Hollibaugh, J. T.: Coastal metabolism and the oceanic organic carbon balance, *Rev. Geophys.*, 31, 75–89, <https://doi.org/10.1029/92RG02584>, 1993.
- Takahashi, T., Olafsson, J., Goddard, J. G., Chipman, D. W., and Sutherland, S. C.: Seasonal variations of CO<sub>2</sub> and nutrients in the high-latitude surface oceans: A comparative study, *Global Biogeochem. Cycles*, 7, 843–878, <https://doi.org/10.1029/93GB02263>, 1993.
- 805 Takahashi, T., Sutherland, S. C., Sweeney, C., Poisson, A., Metz, N., Tilbrook, B., Bates, N., Wanninkhof, R., Feely, R. A., Sabine, C., Olafsson, J., and Nojiri, Y.: Global sea-air CO<sub>2</sub> flux based on climatological surface ocean pCO<sub>2</sub>, and seasonal biological and temperature effects, *Deep Sea Res. Part II Top. Stud. Oceanogr.*, 49, 1601–1622, [https://doi.org/10.1016/S0967-0645\(02\)00003-6](https://doi.org/10.1016/S0967-0645(02)00003-6), 2002.
- Tseng, C. M., Liu, K. K., Gong, G. C., Shen, P. Y., and Cai, W. J.: CO<sub>2</sub> uptake in the East China Sea relying on Changjiang runoff is prone to change, *Geophys. Res. Lett.*, 38, 1–6, <https://doi.org/10.1029/2011GL049774>, 2011.
- 810 Tsunogai, S., Watanabe, S., Nakamura, J., Ono, T., and Sato, T.: A preliminary study of carbon system in the East China Sea, *J. Oceanogr.*, 53, 9–17, <https://doi.org/10.1007/BF02700744>, 1997.
- Vandemark, D., Salisbury, J. E., Hunt, C. W., Shellito, S. M., Irish, J. D., McGillis, W. R., Sabine, C. L., and Maenner, S. M.: Temporal and spatial dynamics of CO<sub>2</sub> air–sea flux in the Gulf of Maine, *J. Geophys. Res.: Oceans*, 116, C01012, <http://dx.doi.org/10.1029/2010JC006408>, 2011.
- 815 van Geen, A., Takesue, R. K., Goddard, J., Takahashi, T., Barth, J. A., and Smith, R. L.: Carbon and nutrient dynamics during coastal upwelling off Cape Blanco, Oregon. *Deep Sea Res. Part II Top. Stud. Oceanogr.*, 47, 975–1002, [https://doi.org/10.1016/S0967-0645\(99\)00133-2](https://doi.org/10.1016/S0967-0645(99)00133-2), 2000.
- Vargas-Yáñez, M., Viola, T. S., Jorge, F. P., Rubín, J. P., and García, M. C.: The influence of tide-topography interaction on low-frequency heat and nutrient fluxes. Application to Cape Trafalgar, *Cont. Shelf Res.*, 22, 115–139, [https://doi.org/10.1016/S0278-4343\(01\)00063-2](https://doi.org/10.1016/S0278-4343(01)00063-2), 2002.
- 820 Volk, T., and Hoffert, M. I.: Ocean carbon pumps: Analysis of relative strengths and efficiencies in ocean-driven atmospheric CO<sub>2</sub> changes in The Carbon Cycle and Atmospheric CO<sub>2</sub>: Natural Variations Archean to Present, *Geophys. Monogr. Ser.*,

32, <https://doi.org/10.1029/GM032p0099>, 1985.

Walsh, J. J.: *On the Nature of Continental Shelves*, Academic Press, New York, 510 pp., 1988

825 Walsh, J. J.: Importance of continental margins in the marine biogeochemical cycling of carbon and nitrogen, *Nature*, 350, 53–55, <http://dx.doi.org/10.1038/350053a0>, 1991.

Wang, S. L., Arthur Chen, C. T., Hong, G. H., and Chung, C. S.: Carbon dioxide and related parameters in the East China Sea, *Cont. Shelf Res.*, 20, 525–544, [https://doi.org/10.1016/S0278-4343\(99\)00084-9](https://doi.org/10.1016/S0278-4343(99)00084-9), 2000.

830 Wang, Z. A., Cai, W. J., Wang, Y., and Ji, H.: The southeastern continental shelf of the United States as an atmospheric CO<sub>2</sub> source and an exporter of inorganic carbon to the ocean, *Cont. Shelf Res.*, 25, 1917–1941, <https://doi.org/10.1016/j.csr.2005.04.004>, 2005.

Wanninkhof, R.: Relationship between wind speed and gas exchange, *J. Geophys. Res.*, 97, 7373–7382, <https://doi.org/10.1029/92JC00188>, 1992.

835 Wanninkhof, R.: Relationship between wind speed and gas exchange over the ocean revisited. *Limnol. Oceanogr. Methods*, 12, 351–362, <https://doi.org/10.4319/lom.2014.12.351>, 2014.

Weiss, R.: Carbon dioxide in water and seawater: the solubility of a non-ideal gas, *Mar. Chem.*, 2, 203–215, [https://doi.org/10.1016/0304-4203\(74\)90015-2](https://doi.org/10.1016/0304-4203(74)90015-2), 1974.

Wollast, R.: The Coastal Carbon Cycle: Fluxes, Sources and Sinks, in: *Ocean Margin Processes in Global Change* Mantoura, edited by: R. F. C., Martin, J. M., and Wollast, R., J. Wiley & Sons, Chichester, 365–382, 1991.

840 Wollast, R.: Interactions of Carbon and Nitrogen cycles in the Coastal Zone, in: *Interactions of C, N, P, and S biogeochemical cycles and global change*, edited by: Wollast R., Mackenzie F. T., and Chou L., Springer, Berlin, NATOASI Series, 14, 195–210, [https://doi.org/10.1007/978-3-642-76064-8\\_7](https://doi.org/10.1007/978-3-642-76064-8_7), 1993.

845 Woolf, D. K., Land, P. E., Shutler, J. D., Goddijn-Murphy, L. M., and Donlon, C. J.: On the calculation of air-sea fluxes of CO<sub>2</sub> in the presence of temperature and salinity gradients, *J. Geophys. Res. Oceans*, 121, 1229–1248, <https://doi.org/10.1002/2015JC011427>, 2016.

Xue, L., Xue, M., Zhang, L., Sun, T., Guo, Z., and Wang, J.: Surface partial pressure of CO<sub>2</sub> and air-sea exchange in the northern Yellow Sea, *J. Mar. Syst.*, 105–108, 194–206, <https://doi.org/10.1016/j.jmarsys.2012.08.006>, 2012.

Xue, L., Gao, L., Cai, W. J., Yu, W., and Wei, M.: Response of sea surface fugacity of CO<sub>2</sub> to the SAM shift south of Tasmania: Regional differences, *Geophys. Res. Lett.*, 42, 3973–3979, <https://doi.org/10.1002/2015GL063926>, 2015.

850 Xue, L., Cai, W. J., Hu, X., Sabine, C., Jones, S., Sutton, A. J., Jiang, L. Q., and Reimer, J. J.: Sea surface carbon dioxide at the Georgia time series site (2006–2007): Air-sea flux and controlling processes, *Prog. Oceanogr.*, 140, 14–26, <https://doi.org/10.1016/j.pocean.2015.09.008>, 2016.

Yentsch, C. S., and Menzel, D. W.: A method for the determination of phytoplankton chlorophyll and pheophytin by fluorescence, *Deep Sea Res. and Oceanogr. Abstracts*, 10, 221–231, [https://doi.org/10.1016/0011-7471\(63\)90358-9](https://doi.org/10.1016/0011-7471(63)90358-9), 1963.

855 Zeebe, R. E., and Wolf-Gladrow, D. A.: *CO<sub>2</sub> in seawater: equilibrium, kinetics, isotopes*, Elsevier Oceanography Series, 347 pp., 2001.

Zhai, W., Dai, M., and Cai, W., Coupling of surface pCO<sub>2</sub> and dissolved oxygen in the northern South China Sea: impacts of contrasting coastal processes, *Biogeosciences*, 6, 2589–2598, <https://doi.org/10.5194/bgd-6-2589-2009>, 2009.

860 Zhang, L., Xue, L., Song, M., and Jiang, C.: Distribution of the surface partial pressure of CO<sub>2</sub> in the southern Yellow Sea and its controls, *Cont. Shelf Res.*, 30, 293–304, <https://doi.org/10.1016/j.csr.2009.11.009>, 2010.

Zhang, L., Xue, M., and Liu, Q.: Distribution and seasonal variation in the partial pressure of CO<sub>2</sub> during autumn and winter in Jiaozhou Bay, a region of high urbanization, *Mar. Pollut. Bull.*, 64, 56–65, <https://doi.org/10.1016/j.marpolbul.2011.10.023>, 2012.

## Tables

865 **Table 1: Date, number of measurements (n), range, average values and standard deviation of underway sea surface temperature (SST), sea surface salinity (SSS) and pCO<sub>2</sub> during the 8 cruises undertaken: March 2014 (ST1), June 2014 (ST2), October 2014 (ST3), December 2014 (ST4), March 2015 (ST5), June 2015 (ST6), September 2015 (ST7) and February 2016 (ST8).**

| Cruise | Date                | n    | SST (°C)    |            | SSS           |              | pCO <sub>2</sub> (µatm) |              |
|--------|---------------------|------|-------------|------------|---------------|--------------|-------------------------|--------------|
|        |                     |      | Range       | Mean ± SD  | Range         | Mean ± SD    | Range                   | Mean ± SD    |
| ST1    | 28/03 - 01/04, 2014 | 3874 | 14.3 - 16.4 | 15.4 ± 0.6 | 35.57 - 37.06 | 36.11 ± 0.18 | 365.4 - 513.6           | 396.5 ± 19.0 |
| ST2    | 25/06 - 01/07, 2014 | 4118 | 17.0 - 22.9 | 21.1 ± 0.9 | 35.90 - 36.45 | 36.21 ± 0.15 | 368.7 - 459.5           | 412.9 ± 12.6 |
| ST3    | 01/10 - 07/10, 2014 | 4233 | 16.1 - 23.4 | 21.5 ± 1.3 | 35.80 - 36.79 | 36.26 ± 0.22 | 391.6 - 444.5           | 413.5 ± 9.8  |
| ST4    | 10/12 - 16/12, 2014 | 2938 | 15.6 - 19.1 | 18.1 ± 0.7 | 34.68 - 36.72 | 36.36 ± 0.21 | 369.6 - 444.5           | 388.7 ± 12.9 |
| ST5    | 28/03 - 01/04, 2015 | 3180 | 14.6 - 16.9 | 15.6 ± 0.4 | 35.54 - 36.52 | 36.12 ± 0.14 | 320.6 - 416.5           | 368.6 ± 14.9 |
| ST6    | 19/06 - 25/06, 2015 | 3677 | 17.4 - 22.1 | 20.9 ± 0.8 | 35.63 - 36.92 | 36.40 ± 0.08 | 372.1 - 464.1           | 410.3 ± 13.8 |
| ST7    | 15/09 - 18/09, 2015 | 2575 | 17.0 - 21.9 | 20.6 ± 1.1 | 35.03 - 36.79 | 35.64 ± 0.08 | 387.6 - 457.1           | 407.6 ± 11.2 |
| ST8    | 02/02 - 03/02, 2016 | 1812 | 15.1 - 17.5 | 16.8 ± 0.4 | 35.83 - 36.55 | 36.44 ± 0.09 | 346.2 - 442.6           | 392.9 ± 17.9 |

**Table 2: Number of samples (n) and mean values and standard deviation for the averaged underway measurements of sea surface temperature (SST) and sea surface salinity (SSS), and pH, apparent oxygen utilization (AOU), chlorophyll-a, nitrate and phosphate in surface water samples (at depth of 5m) at fixed stations during the 8 cruises: March 2014 (ST1), June 2014 (ST2), October 2014 (ST3), December 2014 (ST4), March 2015 (ST5), June 2015 (ST6), September 2015 (ST7) and February 2016 (ST8).**

| Cruise | n  | SST (°C)       | SSS              | pH              | AOU ( $\mu\text{mol L}^{-1}$ ) | Chlorophyll-a ( $\mu\text{g L}^{-1}$ )* | Nitrate ( $\mu\text{mol L}^{-1}$ ) | Phosphate ( $\mu\text{mol L}^{-1}$ ) |
|--------|----|----------------|------------------|-----------------|--------------------------------|-----------------------------------------|------------------------------------|--------------------------------------|
| ST1    | 17 | 15.2 $\pm$ 0.5 | 36.05 $\pm$ 0.13 | 8.06 $\pm$ 0.03 | -3.6 $\pm$ 8.4                 | 0.65 $\pm$ 0.37                         | 0.96 $\pm$ 1.01                    | 0.14 $\pm$ 0.06                      |
| ST2    | 16 | 21.0 $\pm$ 1.3 | 36.11 $\pm$ 0.11 | 7.97 $\pm$ 0.03 | -10.3 $\pm$ 5.7                | 0.18 $\pm$ 0.14                         | 0.42 $\pm$ 0.60                    | 0.12 $\pm$ 0.04                      |
| ST3    | 17 | 21.6 $\pm$ 0.7 | 36.09 $\pm$ 0.28 | 7.97 $\pm$ 0.06 | -4.6 $\pm$ 3.2                 | 0.24 $\pm$ 0.29                         | 0.34 $\pm$ 0.27                    | 0.09 $\pm$ 0.03                      |
| ST4    | 17 | 17.7 $\pm$ 0.7 | 36.03 $\pm$ 0.13 | 8.05 $\pm$ 0.05 | 7.7 $\pm$ 2.1                  | 0.46 $\pm$ 0.33                         | 1.05 $\pm$ 1.96                    | 0.23 $\pm$ 0.09                      |
| ST5    | 16 | 15.4 $\pm$ 0.3 | 36.03 $\pm$ 0.13 | 8.09 $\pm$ 0.12 | -19.1 $\pm$ 9.4                | 0.76 $\pm$ 0.55                         | 0.68 $\pm$ 1.17                    | 0.17 $\pm$ 0.09                      |
| ST6    | 16 | 21.1 $\pm$ 1.0 | 36.37 $\pm$ 0.05 | 8.01 $\pm$ 0.03 | -2.4 $\pm$ 3.2                 | 0.26 $\pm$ 0.34                         | 0.12 $\pm$ 0.14                    | 0.10 $\pm$ 0.05                      |
| ST7    | 17 | 20.6 $\pm$ 1.2 | 35.63 $\pm$ 0.03 | 7.94 $\pm$ 0.03 | -2.6 $\pm$ 5.0                 | 0.29 $\pm$ 0.31                         | 0.37 $\pm$ 0.50                    | 0.50 $\pm$ 0.55                      |
| ST8    | 6  | 16.8 $\pm$ 0.3 | 36.44 $\pm$ 0.04 | 8.09 $\pm$ 0.05 | -5.1 $\pm$ 3.1                 | 0.69 $\pm$ 0.32                         | 0.41 $\pm$ 0.31                    | 0.14 $\pm$ 0.11                      |

\*González-García et al. (2018).



**Table 3: Mean values and standard deviation of mixed layer depth (MLD) in distal areas (depth > 50 m), atmospheric pCO<sub>2</sub> (pCO<sub>2</sub> μatm), wind speed, gas transfer velocity (k) and CO<sub>2</sub> fluxes for the underway measurements during the 8 cruises: March 2014 (ST1), June 2014 (ST2), October 2014 (ST3), December 2014 (ST4), March 2015 (ST5), June 2015 (ST6), September 2015 (ST7) and February 2016 (ST8).**

| Cruise | MLD in distal areas (m) | pCO <sub>2</sub> atm (μatm) | Wind speed (m s <sup>-1</sup> ) | k (cm h <sup>-1</sup> ) | CO <sub>2</sub> fluxes (mmol m <sup>-2</sup> d <sup>-1</sup> ) |
|--------|-------------------------|-----------------------------|---------------------------------|-------------------------|----------------------------------------------------------------|
| ST1    | 71.3 ± 26.4             | 398.7 ± 1.8                 | 7.7 ± 3.4                       | 13.4 ± 0.2              | -0.3 ± 2.3                                                     |
| ST2    | 88.6 ± 34.4             | 404.5 ± 0.5                 | 7.4 ± 3.4                       | 14.0 ± 0.3              | 0.9 ± 1.4                                                      |
| ST3    | 90.3 ± 34.0             | 397.7 ± 0.6                 | 6.7 ± 4.0                       | 11.8 ± 0.4              | 1.4 ± 0.8                                                      |
| ST4    | 96.8 ± 34.1             | 399.4 ± 2.2                 | 7.7 ± 4.2                       | 14.3 ± 0.2              | -1.3 ± 1.7                                                     |
| ST5    | 91.5 ± 31.6             | 405.5 ± 0.6                 | 5.5 ± 2.8                       | 6.9 ± 0.1               | -2.3 ± 0.9                                                     |
| ST6    | 89.0 ± 33.0             | 406.1 ± 0.8                 | 7.5 ± 4.1                       | 14.4 ± 0.3              | 0.5 ± 1.5                                                      |
| ST7    | 90.2 ± 32.0             | 398.4 ± 0.7                 | 7.0 ± 3.2                       | 12.3 ± 0.3              | 0.9 ± 1.1                                                      |
| ST8    | 87.0 ± 40.3             | 406.4 ± 0.3                 | 6.8 ± 3.1                       | 10.6 ± 0.1              | -1.3 ± 1.6                                                     |

**Table 4: Mean and range of pCO<sub>2</sub> and CO<sub>2</sub> fluxes (FCO<sub>2</sub>) found in different areas of the Gulf of Cádiz.**

| Site                                    | °E          | °N          | Date                                                                         | pCO <sub>2</sub> (µatm) | FCO <sub>2</sub> (mmol m <sup>-2</sup> d <sup>-1</sup> )* | Reference                     |
|-----------------------------------------|-------------|-------------|------------------------------------------------------------------------------|-------------------------|-----------------------------------------------------------|-------------------------------|
| Strait of Gibraltar                     | -5.5 - -5.2 | 35.6 - 36.0 | September 1997                                                               | 339 - 381               | 3 ± 8 <sup>a</sup>                                        | Santana-Casiano et al. (2002) |
| Gulf of Cádiz                           | -7.0 - -6.5 | 36.3 - 36.7 | February 1998                                                                | 334 - 416               | -19.5 ± 3.5 <sup>a</sup>                                  | González-Dávila et al. (2003) |
| Gulf of Cádiz                           | -8.3 - -6.0 | 33.5 - 37.0 | July 2002                                                                    | 300 - 450               | 18.6 ± 4 <sup>a</sup>                                     | Aït-Ameur and Goyet (2006)    |
| Northeastern shelf of the Gulf of Cádiz | -7.5 - -6.3 | 36.6 - 37.3 | March 2003 to March 2004                                                     | 130 - 650               | -2.5 - 1.0 <sup>a</sup>                                   | Huertas et al. (2006)         |
| Strait of Gibraltar                     | -6.0 - -5.2 | 35.8 - 36.1 | September, December 2005; March, May 2006                                    | 320 - 400               | -1.9 - 1.9 <sup>a</sup>                                   | de la Paz et al. (2009)       |
| Northeastern shelf of the Gulf of Cádiz | -6.8 - -6.3 | 36.4 - 36.9 | June, November 2006; February, May 2007                                      | 338 - 502               | -2.2 - 3.6 <sup>a</sup>                                   | Ribas-Ribas et al. (2011)     |
| Gulf of Cádiz                           | -6.0 - -7.2 | 35.4 - 36.7 | March, June, October, December 2014; March, June, September 2015; March 2016 | 321 - 514               | -2.3 - 1.5 <sup>b</sup>                                   | This work                     |

\*Gas transfer coefficient (k): <sup>a</sup> Wanninkhof (1992) and <sup>b</sup> Wanninkhof et al. (2014).

## Figures

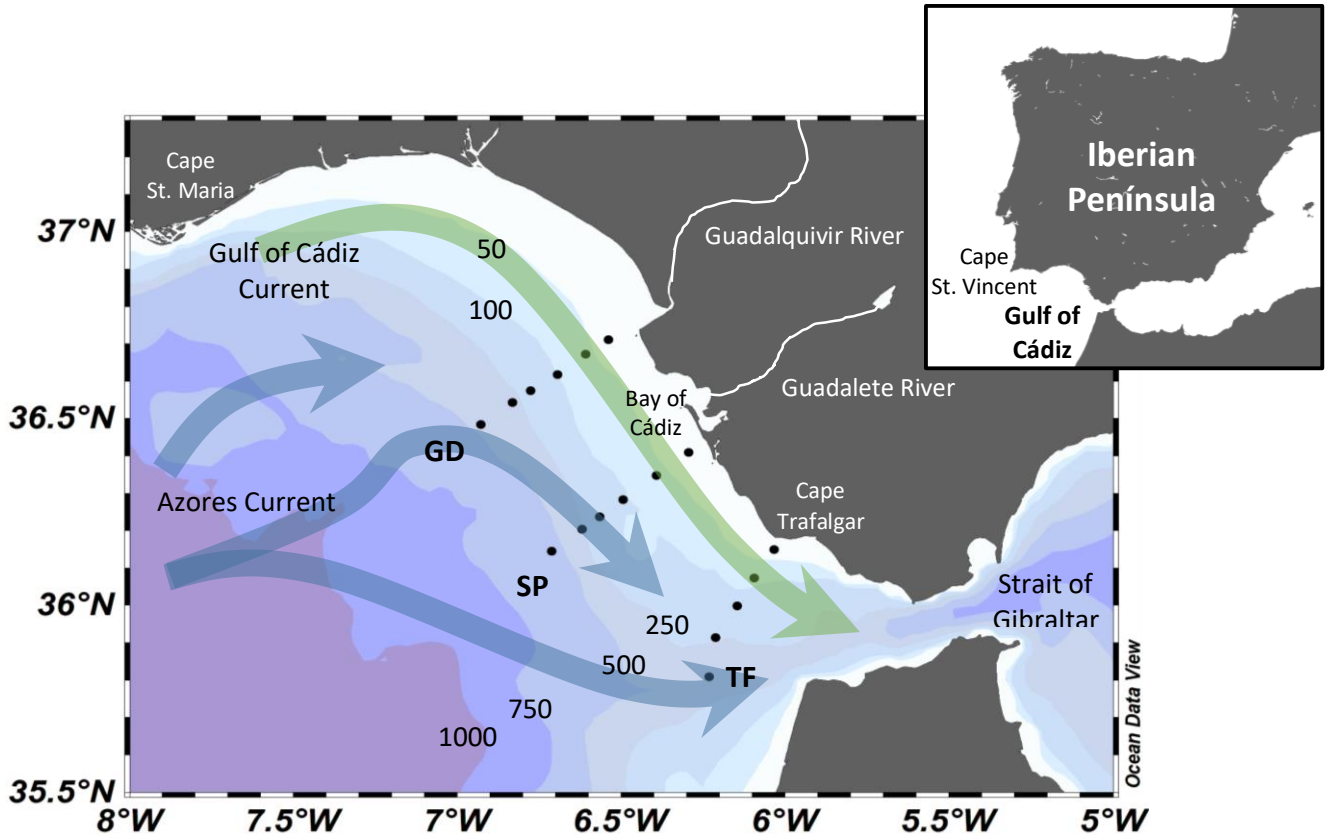

885

Figure 1: Map of the eastern shelf of the Gulf of Cádiz showing the location of the fixed stations located on 3 transects at right-angles to the coastline: Guadalquivir (GD), Sancti Petri (SP) and Trafalgar (TF). The location of the principal surface currents, rivers and capes of the study area are also noted.



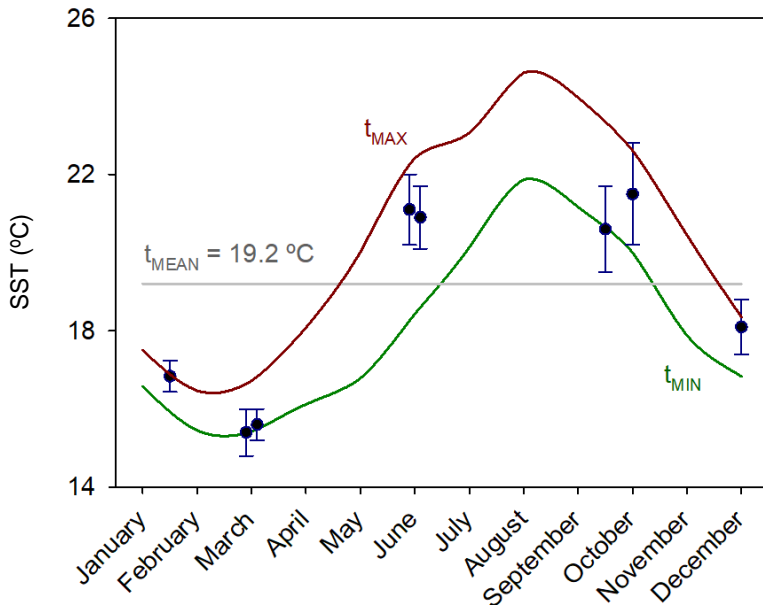

**Figure 3: Maximum and minimum sea surface temperature (SST) variation during a 10-year period recorded by an oceanographic buoy located in the Gulf of Cádiz (36.48°N - 6.96°W). The red line shows maximum SST variation. The green line shows minimum SST variation. The grey line shows the average temperature for the 10-year period. Blue circles show mean values and standard deviations of underway SST measured during the eight cruises carried out during this study.**

925

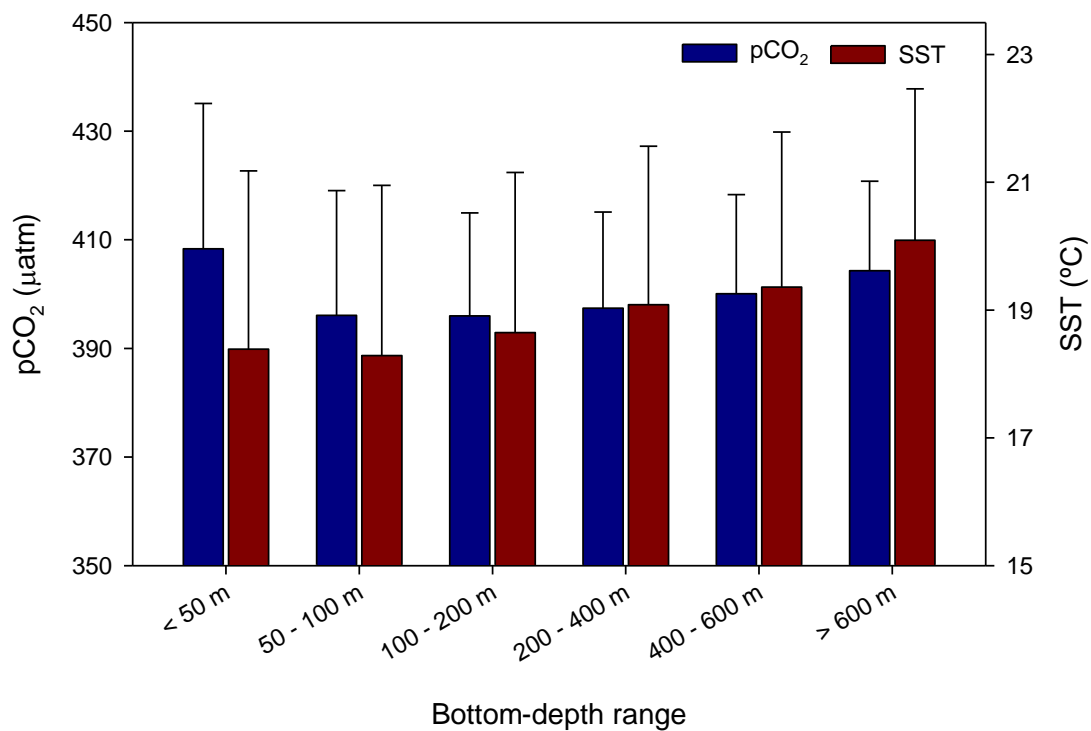

**Figure 4: Underway variation of pCO<sub>2</sub> and sea surface temperature (SST) at different bottom-depth ranges of the water column (m) during the 8 cruises. The mean values and standard deviations of pCO<sub>2</sub> (blue) and SST (red) for each range of depth are represented.**

930

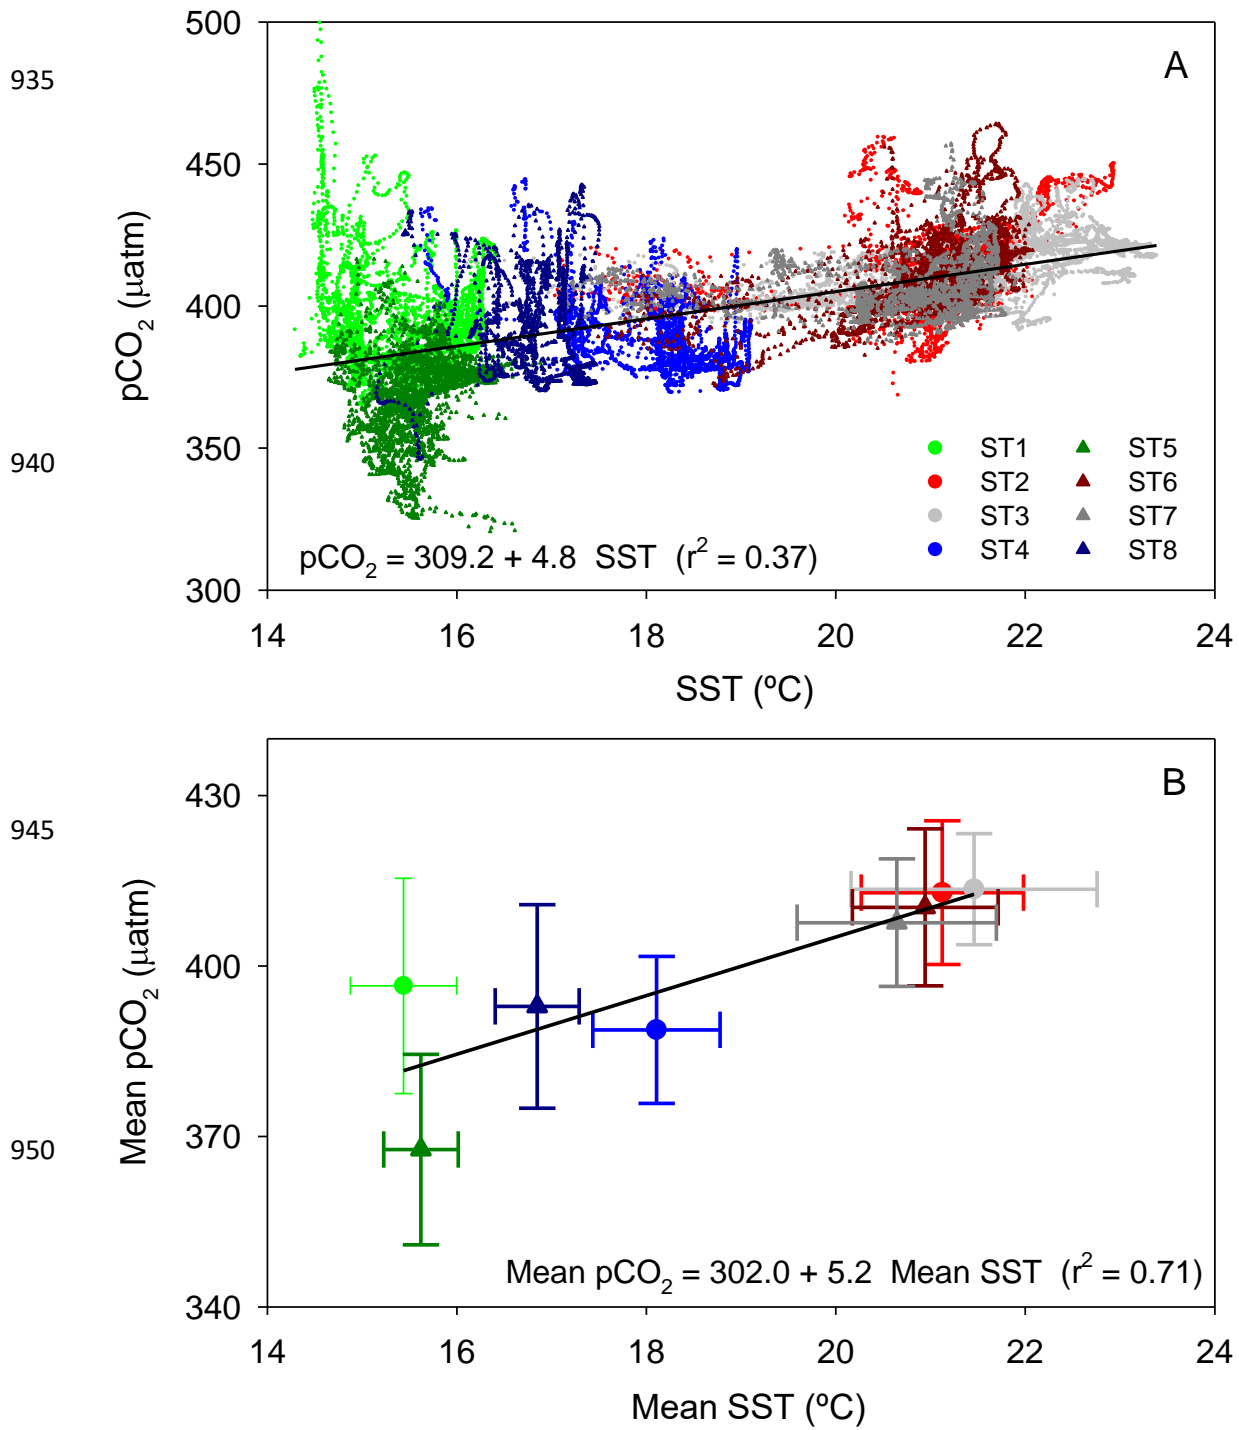

955 **Figure 5: Dependence of pCO<sub>2</sub> with sea surface temperature (SST) for the complete underway database during all the cruises (A) and for the mean values of pCO<sub>2</sub> and SST for each cruise showing their standard deviations (B). The solid line shows the linear correlation.**

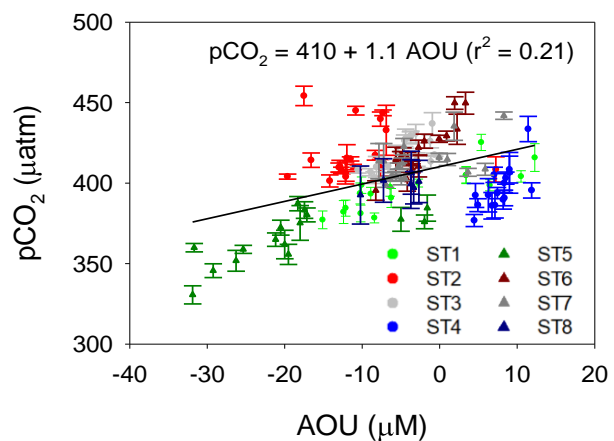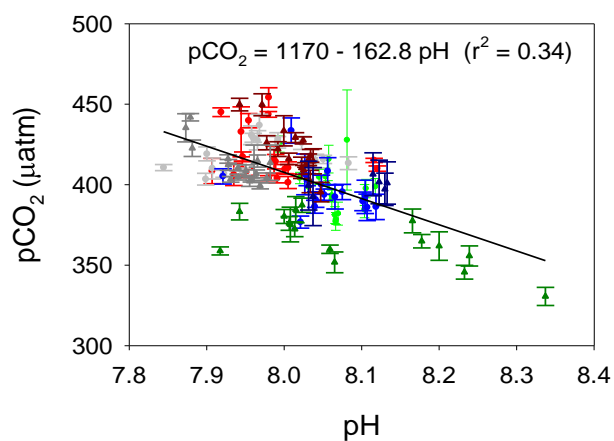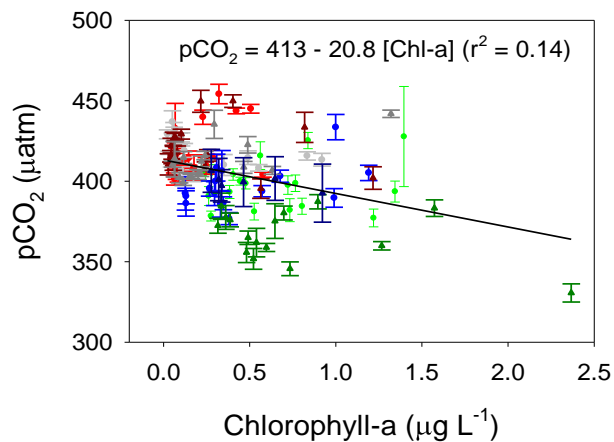

980

**Figure 6: Dependence between the surface values of pCO<sub>2</sub> and Apparent Oxygen Utilization (AOU), pH, and chlorophyll-a (Chl-a) at the 16 discrete stations during the 8 cruises. pCO<sub>2</sub> presents the standard deviation associated with the mean value obtained from the underway measurements.**

985



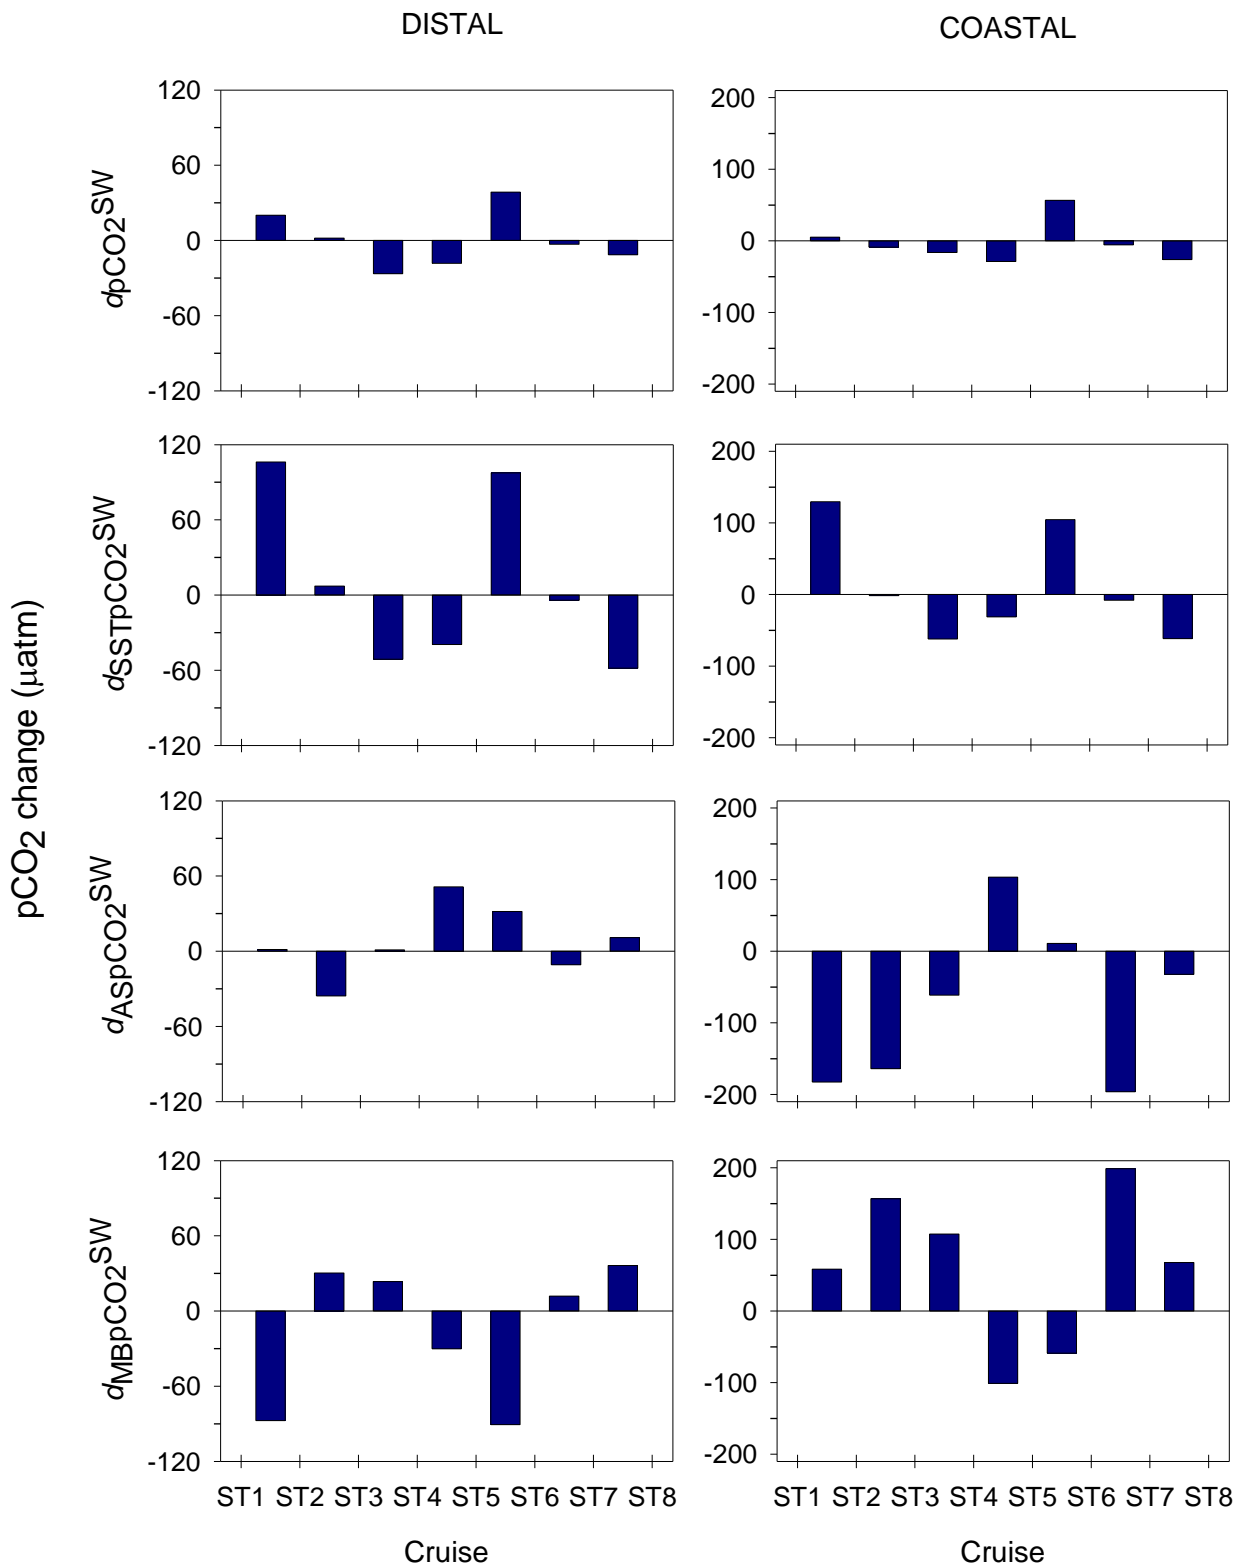

Figure 7: Observed changes in pCO<sub>2</sub> (first row) and expected due to: SST changes (second row), air-sea CO<sub>2</sub> exchange (third row) and biology plus mixing (last row) in the distal (left column) and coastal areas (right column) between the periods of each cruise: ST1 (March 2014), ST2 (June 2014), ST3 (October 2014), ST4 (December 2014), ST5 (March 2015), ST6 (June 2015), ST7 (September 2015) and ST8 (February 2016).

990

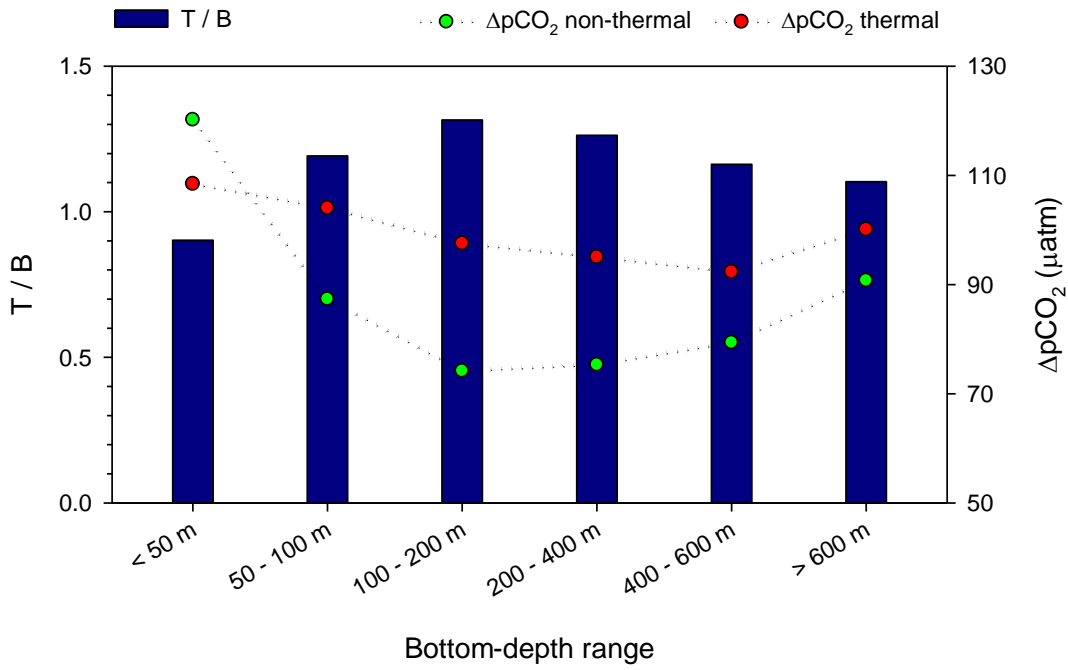

Figure 8: Variation of the T/B ratio (blue bar),  $\Delta p\text{CO}_2$  non-thermal (green point) and  $\Delta p\text{CO}_2$  thermal (red point) at different bottom-depth ranges of the water column (m) for the 8 cruises.

995

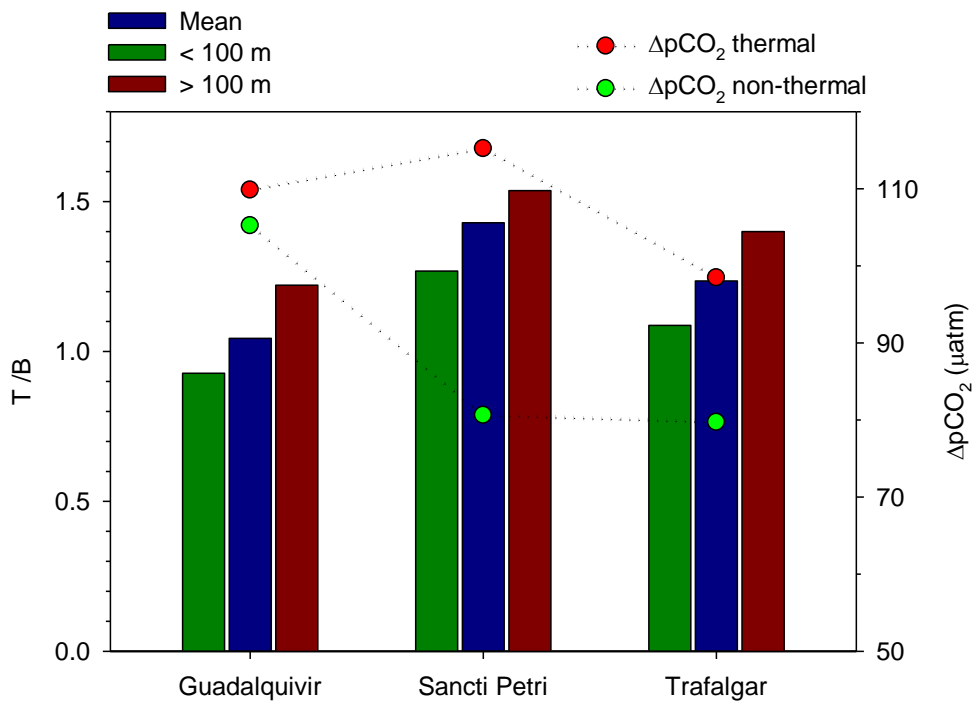

**Figure 9: Variation of the T/B ratio (blue bar), the T/B ratio at depths < 100 m (green bar), the T/B ratio at depths > 100 m (red bar), ΔpCO<sub>2</sub> non-thermal (green point) and ΔpCO<sub>2</sub> thermal (red point) on the 3 transects of the study (Guadalquivir, Sancti Petri and Trafalgar) during the 8 cruises.**

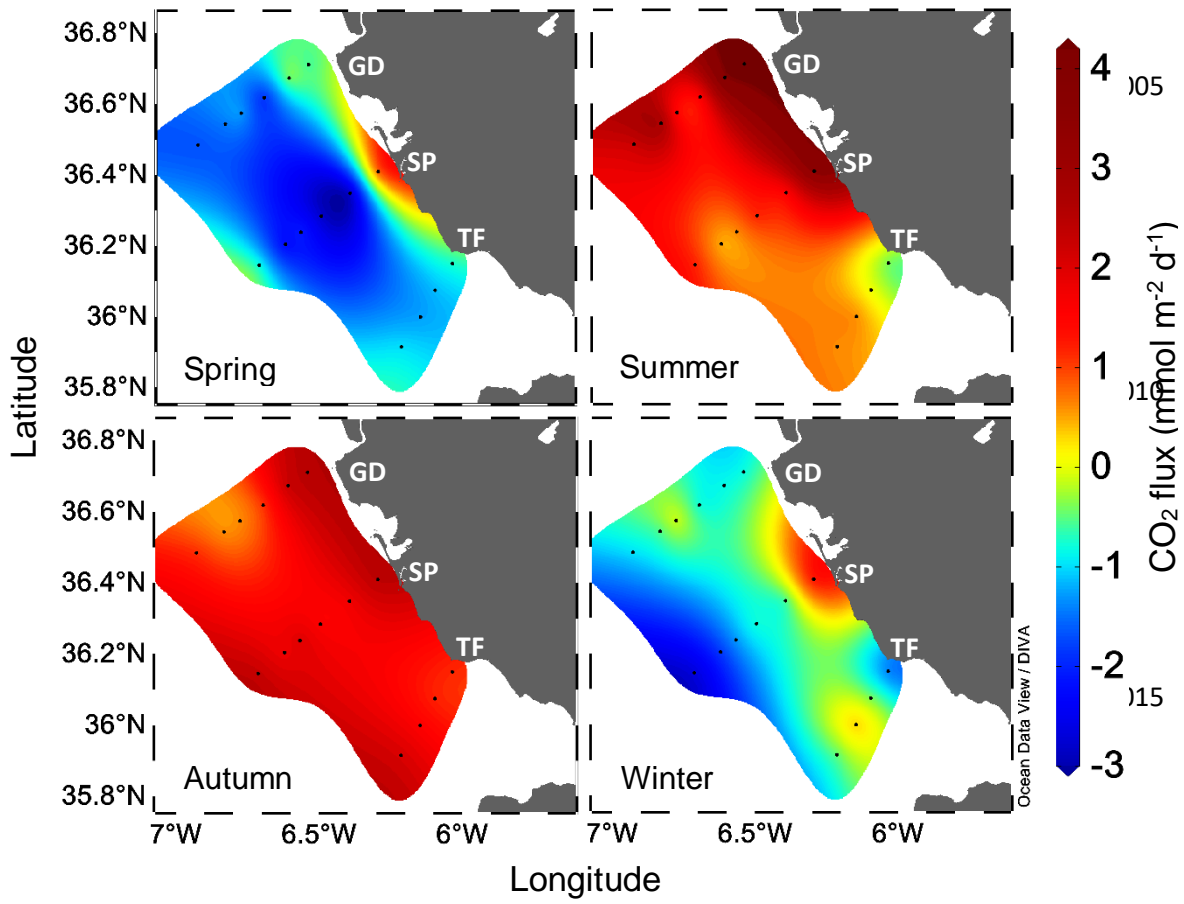

Figure 10: Spatial distribution of mean values of CO<sub>2</sub> fluxes in the eastern shelf of the Gulf of Cádiz at the 16 discrete stations during spring (ST1, ST5), summer (ST2, ST6), autumn (ST3, ST7) and winter (ST4, ST8).

1020

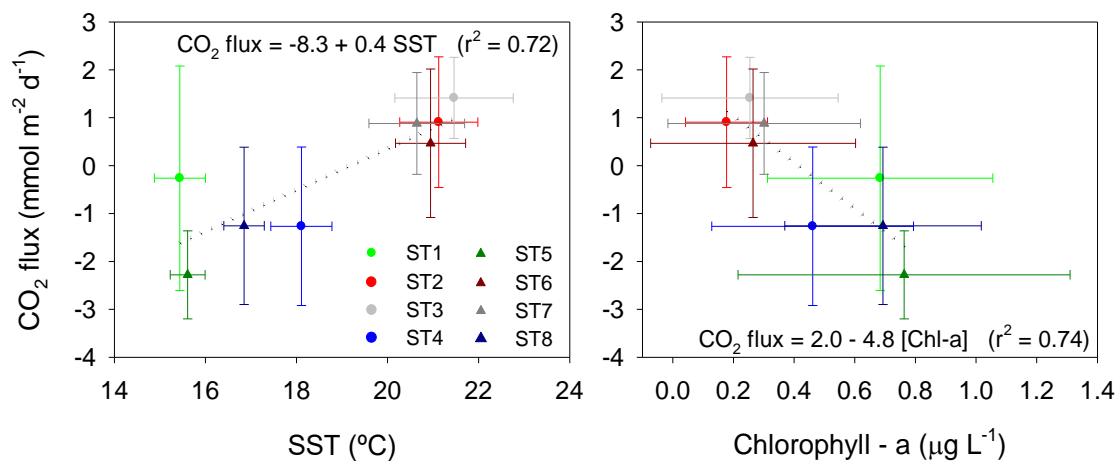

Figure 11: Correlations between the mean values of CO<sub>2</sub> fluxes and sea surface temperature (SST) for the underway database (left), and the CO<sub>2</sub> fluxes and chlorophyll-a (Chl-a) at the 16 discrete surface stations (right) for each cruise and showing the standard deviations.

1025
